# Supplementary material for: Impact of home telemonitoring and management support on blood pressure control in non-dialysis CKD: a systematic review protocol
Source: PubMed Central journal article supplement — BMJ Open. 2021 May 25;11(5):e044195. doi: 10.1136/bmjopen-2020-044195 (PMC8154939; doi:10.1136/bmjopen-2020-044195), 2021-05-25
Supplement: bmjopen-2020-044195.draft_revisions.pdf [file bmjopen-2020-044195.draft_revisions.pdf]

# BMJ Open

BMJ Open is committed to open peer review. As part of this commitment we make the peer review history of every article we publish publicly available.

When an article is published we post the peer reviewers' comments and the authors' responses online. We also post the versions of the paper that were used during peer review. These are the versions that the peer review comments apply to.

The versions of the paper that follow are the versions that were submitted during the peer review process. They are not the versions of record or the final published versions. They should not be cited or distributed as the published version of this manuscript.

BMJ Open is an open access journal and the full, final, typeset and author-corrected version of record of the manuscript is available on our site with no access controls, subscription charges or pay-per-view fees (<http://bmjopen.bmj.com>).

If you have any questions on BMJ Open's open peer review process please email [info.bmjopen@bmj.com](mailto:info.bmjopen@bmj.com)

# BMJ Open

## Impact of Home Telemonitoring and Management Support on Blood Pressure Control in Non-dialysis CKD: A Systematic Review Protocol.

|                               |                                                                                                                                                                                                                                                                                                                                                                                                                                                                                                                                                                                                                                                                                                                                                                                                                                                                                                                                                                          |
|-------------------------------|--------------------------------------------------------------------------------------------------------------------------------------------------------------------------------------------------------------------------------------------------------------------------------------------------------------------------------------------------------------------------------------------------------------------------------------------------------------------------------------------------------------------------------------------------------------------------------------------------------------------------------------------------------------------------------------------------------------------------------------------------------------------------------------------------------------------------------------------------------------------------------------------------------------------------------------------------------------------------|
| Journal:                      | <i>BMJ Open</i>                                                                                                                                                                                                                                                                                                                                                                                                                                                                                                                                                                                                                                                                                                                                                                                                                                                                                                                                                          |
| Manuscript ID                 | bmjopen-2020-044195                                                                                                                                                                                                                                                                                                                                                                                                                                                                                                                                                                                                                                                                                                                                                                                                                                                                                                                                                      |
| Article Type:                 | Protocol                                                                                                                                                                                                                                                                                                                                                                                                                                                                                                                                                                                                                                                                                                                                                                                                                                                                                                                                                                 |
| Date Submitted by the Author: | 26-Aug-2020                                                                                                                                                                                                                                                                                                                                                                                                                                                                                                                                                                                                                                                                                                                                                                                                                                                                                                                                                              |
| Complete List of Authors:     | Okpechi, Ikechi G ; University of Cape Town, Division of Nephrology and Hypertension; University of Alberta, Edmonton, Alberta, Canada. ,<br>Medicine<br>Muneer, Shezel; University of Alberta, Edmonton, Alberta, Canada. ,<br>Medicine<br>Tinwala, Mohammed; University of Alberta, Edmonton, Alberta, Canada. ,<br>Medicine<br>Zaidi, Deenaz; University of Alberta, Edmonton, Alberta, Canada. ,<br>Medicine<br>Hamonic, Laura; University of Alberta, John W. Scott Health Sciences Library<br>Braam, Branko; University of Alberta Faculty of Medicine and Dentistry, Nephrology<br>Jindal, Kailash<br>Klarenbach, Scott; University of Alberta, Edmonton, Alberta, Canada. ,<br>Medicine<br>Padwal, Raj S ; University of Alberta,<br>Shojai, Soroush ; University of Alberta Faculty of Medicine and Dentistry,<br>;<br>Thompson, Stephanie; University of Alberta, Nephrology<br>Bello, A; University of Alberta Faculty of Medicine and Dentistry,<br>Medicine |
| Keywords:                     | Hypertension < CARDIOLOGY, Chronic renal failure < NEPHROLOGY, Kidney & urinary tract disorders < UROLOGY                                                                                                                                                                                                                                                                                                                                                                                                                                                                                                                                                                                                                                                                                                                                                                                                                                                                |
|                               |                                                                                                                                                                                                                                                                                                                                                                                                                                                                                                                                                                                                                                                                                                                                                                                                                                                                                                                                                                          |

SCHOLARONE™  
Manuscripts

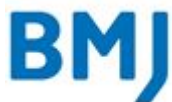

I, the Submitting Author has the right to grant and does grant on behalf of all authors of the Work (as defined in the below author licence), an exclusive licence and/or a non-exclusive licence for contributions from authors who are: i) UK Crown employees; ii) where BMJ has agreed a CC-BY licence shall apply, and/or iii) in accordance with the terms applicable for US Federal Government officers or employees acting as part of their official duties; on a worldwide, perpetual, irrevocable, royalty-free basis to BMJ Publishing Group Ltd ("BMJ") its licensees and where the relevant Journal is co-owned by BMJ to the co-owners of the Journal, to publish the Work in this journal and any other BMJ products and to exploit all rights, as set out in our [licence](#).

The Submitting Author accepts and understands that any supply made under these terms is made by BMJ to the Submitting Author unless you are acting as an employee on behalf of your employer or a postgraduate student of an affiliated institution which is paying any applicable article publishing charge ("APC") for Open Access articles. Where the Submitting Author wishes to make the Work available on an Open Access basis (and intends to pay the relevant APC), the terms of reuse of such Open Access shall be governed by a Creative Commons licence – details of these licences and which [Creative Commons](#) licence will apply to this Work are set out in our licence referred to above.

Other than as permitted in any relevant BMJ Author's Self Archiving Policies, I confirm this Work has not been accepted for publication elsewhere, is not being considered for publication elsewhere and does not duplicate material already published. I confirm all authors consent to publication of this Work and authorise the granting of this licence.

**Title:** Impact of Home Telemonitoring and Management Support on Blood Pressure Control in Non-dialysis CKD: A Systematic Review Protocol.

**Authors:**

Ikechi G. Okpechi;<sup>1,2,3</sup> Shezel Muneer;<sup>1</sup> Mohammed M. Tinwala;<sup>1</sup> Deenaz Zaidi; Laura N. Hamonic;<sup>4</sup> Branko Braam;<sup>1</sup> Kailash Jindal;<sup>1</sup> Scott Klarenbach;<sup>1</sup> Raj Padwal;<sup>1</sup> Soroush Shojai;<sup>1</sup> Stephanie Thompson;<sup>1</sup> Aminu K. Bello<sup>1</sup>

**Author Affiliation:**

- 1- Division of Nephrology and Immunology, Faculty of Medicine and Dentistry, University of Alberta, Edmonton, Alberta, Canada
- 2- Division of Nephrology and Hypertension, University of Cape Town, South Africa
- 3- Kidney and Hypertension Research Unit, University of Cape Town, South Africa
- 4- John W. Scott Health Sciences Library, University of Alberta, Edmonton, Alberta, Canada.

**Address for correspondence:**

**Name:** Aminu K. Bello

**Address:** Division of Nephrology and Immunology, Faculty of Medicine and Dentistry, University of Alberta, Edmonton, Alberta, Canada

**Email:** aminu1@ualberta.ca

**Abstract word count:** 250

**Manuscript word count:** 3,316

**Running Title:** Home BP telemonitoring in CKD

**Keywords:** CKD, hypertension, blood pressure control, telemonitoring, eHealth, management support

**Abstract*****Introduction:***

Hypertension is a common public health problem and a key modifiable risk factor for cardiovascular and chronic kidney disease (CKD). Home blood pressure (BP) telemonitoring (HBPT) and management is associated with improved BP control, accelerated delivery of care and decision-making strategies that can reduce adverse outcomes associated with hypertension. The aim of this paper is to describe the protocol for a systematic review to assess the impact of HBPT interventions used for improving BP control and reducing CV and kidney outcomes in non-dialysis CKD patients.

***Methods:***

We will develop this protocol by using the Preferred Reporting Items for Systematic reviews and Meta-Analyses for Protocols 2015 (PRISMA-P 2015). We will search empirical databases such as MEDLINE, Embase, Cochrane Library, CINAHL, Web of Science and PsycINFO and grey literature for studies conducted in non-dialysis CKD patients on interventions using HBPT and reporting outcomes related to BP control and other outcomes such as CV events and kidney disease progression. All studies meeting these criteria, in adults and published from inception until 2020 with no language barrier will be included.

***Ethics and dissemination:***

Ethical approval will not be required for this review as the data used will be extracted from already published studies with publicly accessible data. As this study will assess the impact of HBPT on BP control in non-dialysis CKD patients, evidence gathered through it will be disseminated using traditional approaches that includes open-access peer-reviewed publication, scientific presentations and a report. We will also disseminate our findings to appropriate government agencies.

**Strengths and limitations of this protocol:**

- This study will be able to determine the impact of home blood pressure telemonitoring and management support (e.g. pharmacist, nurse, health aid etc) on blood pressure control in patients with non-dialysis CKD
- This study will also be able to determine if home blood pressure telemonitoring has any impact on cardiovascular and kidney-related outcomes in patients with non-dialysis CKD
- A potential limitation of this study could be heterogeneity and number of studies of low quality which could affect pooled estimates and our ability to conduct a meta-analysis.

## Introduction

Hypertension, also known as raised or high blood pressure (BP), is a prevalent global public health problem and an important modifiable risk factor for cardiovascular disease (CVD) and chronic kidney disease (CKD). Hypertension is defined as office systolic BP (SBP) values  $\geq 140$  mmHg and/or diastolic BP (DBP) values  $\geq 90$  mmHg (Table 1).<sup>1</sup> The prevalence of hypertension in the global adult population was estimated to be 31.1% (95% CI: 30.0% - 32.2%) in 2010, representing 1.38 billion people who were affected worldwide.<sup>2</sup> Notwithstanding the extensive availability of effective treatment options, BP control remains sub-optimal, especially in low- and middle-income countries for reasons that includes poor-adherence, clinical inertia, and organizational failure.<sup>2,3</sup> A number of interventions have been targeted at improving medications adherence, as it is a major reason for poor BP control, including those at physician level (e.g. improving counselling and education), patient level (e.g. self-monitoring of BP) and at healthcare system level (e.g. support to the development of monitoring systems).<sup>1</sup>

Some of the major challenges with care in hypertension relates to the proportion of people who are aware (diagnosed), receiving treatment or those treated who have achieved control to target of their BP. Data from the International Society of Hypertension (ISH) screening program (May Measurement Month [MMM]) in 2019 showed that of 1.5 million people who were screened for hypertension, 32.0% had never had a BP measurement before and 34.0% had hypertension. Of those identified to be hypertensives, 58.7% were aware, 54.7% were on treatment, 31.7% were controlled to  $<140/90$  mmHg and 23.3% had untreated, or inadequately treated hypertension.<sup>4</sup> The results of previous ISH regional screening programs for MMM support this global trend.<sup>5,6</sup> The low proportion of patients with hypertension who are controlled, suggests a need for practical and sustainable models to

1  
2  
3 improve BP control at the population level in order to reduce the excess risk of CVD and  
4  
5 other target organ damage associated with hypertension.  
6

## 7 **Hypertension in CKD**

8  
9  
10 Hypertension is a common cause of CKD and highly prevalent among patients with  
11  
12 CKD with an increased incidence and prevalence as kidney function declines. Hypertension  
13  
14 is present in as high as 87.5% of CKD patients compared with only 28.5% of patients in the  
15  
16 general population.<sup>7</sup> The United States Renal Data System (USRDS) reports that  
17  
18 hypertension is present in about 23.3% of the general population without CKD and in patients  
19  
20 with CKD, occurs in 35.8% (stage 1), 48.1% (stage 2), 59.9% (stage 3), and 84.1% (stages 4  
21  
22 and 5).<sup>8</sup> Guideline recommendations for diagnosing, monitoring and treating hypertension in  
23  
24 the general population and in patients with CKD are frequently revised and updated.<sup>1,9,10</sup> The  
25  
26 KDIGO guideline on management of BP in CKD recommends the use of lifestyle  
27  
28 modifications and pharmacological treatments for lowering BP in non-dialysis CKD patients.  
29  
30 These measures include individualizing BP targets with the use of various BP lowering  
31  
32 agents, achieving and maintaining a healthy weight (BMI 20 – 25kg/m<sup>2</sup>), lowering salt intake  
33  
34 to <2g (<90 mmol of sodium) per day, undertaking exercise that is compatible with  
35  
36 cardiovascular health and tolerance for at least 30 minutes 5 times per week and limiting  
37  
38 intake of alcohol as options for BP control.<sup>9</sup>  
39  
40  
41  
42  
43

44  
45 Blood pressure exhibits a high level of short term (24-hour ambulatory recordings)  
46  
47 and long-term (office visit-to-visit) variability and both are associated with adverse outcomes  
48  
49 independent of mean 24-hour or office-to-office BP values.<sup>11,12</sup> A number of studies have  
50  
51 reported on the association between BP variability and risk CV events, progression of kidney  
52  
53 failure or death in patients with CKD.<sup>13-15</sup> Although they mainly report no usefulness of  
54  
55 short-term variability in predicting adverse events in CKD patients, they show an association  
56  
57 with CV events and death using long-term BP variability. In one Italian study of 402 CKD  
58  
59  
60



1  
2  
3 patients with median follow-up of 4.8 years, although long-term BP variability was  
4  
5 associated with composite end-point of CV event or death (HR: 1.24; 95% confidence  
6  
7 interval (CI): 1.01 – 1.51 per 5-mmHg higher systolic difference of office systolic BP), short-  
8  
9 term systolic BP variability was not (HR: 0.92; 95%CI; 0.68 – 1.25 per 5-mm Hg higher SD  
10  
11 of 24-hour ambulatory systolic BP).<sup>13</sup> In another large population-based cohort that included  
12  
13 225,759 Chinese hypertensive adults with median follow-up of 70.5 months, there were  
14  
15 25,714 CV events, 27,603 incident CKD and 16,778 deaths reported. Systolic BP variability  
16  
17 was continuously and positively associated with increased CV events (hazard ratio 1.35, 95%  
18  
19 CI 1.30-1.39]), incident CKD (HR 1.39, 95% CI 1.35-1.43) and mortality risk (HR 1.40, 95%  
20  
21 CI 1.34-1.45).<sup>16</sup>

### 22 23 24 25 26 **Home blood pressure telemonitoring (HBPT)**

27  
28 Blood pressures recorded out-of-office (either home BP monitoring [HBPM] or  
29  
30 ambulatory BP monitoring [ABPM]) provide readings taken in conditions that are more  
31  
32 representative of daily life than conventional office readings. Given that the goal of  
33  
34 hypertension detection and treatment is to reduce mortality, and adverse CV and kidney  
35  
36 outcomes, use of HBPM is encouraged as it is more accurate and superior to office BP  
37  
38 monitoring (OBPM) in predicting CV events and all-cause mortality.<sup>17,18</sup> Also, OBPM does  
39  
40 not always correctly identify patients with hypertension due to “white-coat” or “masking”  
41  
42 effects, however, HBPM improves BP monitoring and provides more representative BP data  
43  
44 and better prediction of outcomes.<sup>19</sup> The ability to transmit, in real-time, data from HBPM  
45  
46 device to a caregiver improves the chance of better BP control when combined to decision-  
47  
48 making strategies can reduce adverse outcomes associated with hypertension.<sup>20</sup>

49  
50  
51  
52  
53  
54 Home BP telemonitoring (HBPT) is based on the use of clinically validated electronic  
55  
56 automated BP monitors storing BP values obtained at patient’s home and promotes a more  
57  
58 effective link between patients and their caregivers.<sup>20,21</sup> Increasingly, researchers have  
59  
60

1  
2  
3 leveraged on telemonitoring technology for the monitoring and treatment of patients with  
4 various chronic conditions such as heart diseases,<sup>22</sup> respiratory diseases,<sup>23</sup> diabetes<sup>24</sup> and  
5 hypertension.<sup>25,26</sup>  
6  
7  
8  
9

10 The Telemonitoring and Self-Management in Hypertensions (TASMINH2) study has  
11 shown that self-management of hypertension is possible as most participants made at least  
12 one medication change, were confident about self-monitoring and many felt their multiple  
13 home readings were more valid than single office readings taken by their doctor.<sup>27,28</sup> In a  
14 subsequent study (TASMINH4), when compared to usual care, the adjusted mean SBP  
15 differences with self-monitoring was  $-3.5$  mm Hg [95% CI  $-5.8$  to  $-1.2$ ;  $P=0.0029$ ] and  
16  $-4.7$  mm Hg [ $-7.0$  to  $-2.4$ ;  $P<0.0001$ ] for telemonitoring.<sup>29</sup> HBPT has also been shown to  
17 be cost-effective<sup>30</sup> and more effective in achieving BP control than usual care (RR: 1.16; 95%  
18 CI: 1.08–1.25;  $P<0.001$ ).<sup>31</sup> However, when HBPT was combined with additional care (e.g.  
19 counselling, education, behavioral management, etc) and compared with HBPT alone, there  
20 was increased mean changes in SBP and DBP, suggesting that HBPT can be more efficacious  
21 when proactive additional support is provided.<sup>31</sup>  
22  
23  
24  
25  
26  
27  
28  
29  
30  
31  
32  
33  
34  
35  
36  
37

38 Other outcomes (e.g. quality of life and cost) have also been evaluated when In patients  
39 with kidney disease, telemonitoring has also been shown as a useful tool for improving  
40 quality of life (QoL)<sup>32</sup> and associated with reduced healthcare resource utilization and costs  
41 in patients receiving automated peritoneal dialysis.<sup>33</sup> A recent systematic review and meta-  
42 analysis was conducted to evaluate the effects of telehealth on BP management in non-  
43 dialysis CKD patients.<sup>34</sup> From the 2 studies they included for meta-analysis, pooled estimates  
44 showed decreased SBP (mean difference (MD),  $-5.10$ ; 95% CI:  $-11.34$ ,  $1.14$ ;  $p=0.11$ ),  
45 increased DBP (MD,  $0.45$ ; 95% CI,  $-4.24$ ,  $5.13$ ;  $p=0.85$ ), decreased serum creatinine (pooled  
46 MD,  $-0.38$ ; 95% CI,  $-0.83$ ,  $0.07$ ;  $p=0.10$ ) and maintained eGFR (pooled MD,  $4.72$ ; 95% CI,  $-$   
47  $1.85$ ,  $11.29$ ;  $p=0.16$ ) in the telehealth group.<sup>34</sup> However, Luo et al used studies with telehealth  
48  
49  
50  
51  
52  
53  
54  
55  
56  
57  
58  
59  
60

1  
2  
3 interventions for BP control in only stage 3 – 5 CKD patients. Table 2 is a summary of the  
4 characteristics of their study design and the planned characteristics of our study.  
5  
6

### 7 **Objective:**

8  
9  
10 Given that an increasing number of studies<sup>25-29</sup> have shown the efficacy of HBPT on  
11 hypertension control and outcomes with dearth of data for CKD, the aim of the current  
12 review is to specifically determine the impact of HBPT and management support on BP  
13 control and other pre-specified CV and kidney-related outcomes in patients with non-dialysis  
14 CKD.  
15  
16  
17  
18  
19  
20

### 21 **Methods and Analysis**

22  
23 We used the Preferred Reporting Items for Systematic reviews and Meta-Analyses for  
24 Protocols 2015 (PRISMA-P 2015) to develop this protocol.<sup>35</sup> PROSPERO registration  
25 number: (CRD42020190705).  
26  
27  
28  
29

### 30 **Criteria for considering studies for the review**

#### 31 *Types of studies*

32  
33 We plan to include all study designs including time series studies, before/after studies,  
34 observational studies, randomized controlled trials (RCTs) as well previously published  
35 reviews that evaluated telemonitoring for BP control or reports an outcome.  
36  
37  
38  
39  
40  
41

#### 42 *Types of participants*

43  
44 We will include studies that have participants over 18 years of age, regardless of sex  
45 and ethnicity with a diagnosis of CKD (stage 1 to 5, but not on dialysis and not transplanted).  
46  
47  
48

#### 49 *Types of interventions*

50  
51 The intervention of interest will be use of HBPT (with or without management  
52 support - nurses, pharmacist, physician, informed self-management of medications, health  
53 aids, etc). A telemonitoring intervention will be defined as any process or program that  
54 involves transmission of BP records via information and communication technologies (ICT)  
55  
56  
57  
58  
59  
60

1  
2  
3 using conduits leveraging a telephone or internet line (phones, computers, tablets, etc). To be  
4 eligible, included studies will have reported on at least one outcome of interest. Comparators  
5 will include usual care and other interventions such as other BP device, education,  
6 counselling and behavioral management used to control BP. Studies that include only patients  
7 with CKD and no comparators will also be included if they meet other inclusion criteria.

### 14 ***Types of outcome assessments***

15  
16  
17 The primary outcome will be any changes in mean SBP, mean DBP and/or mean  
18 arterial pressure (MAP) as well as proportion of controlled BP defined by each randomized  
19 trial's investigators. Secondary outcomes will include progression of CKD (eGFR,  
20 proteinuria criteria), hospitalizations, incident fatal and non-fatal CV events, all-cause  
21 mortality, cost effectiveness, patient-reported outcome measures and patient-reported  
22 experience measures.

### 29 **Search methods for identification of studies**

#### 30 ***Electronic searches***

31  
32  
33 We will electronically search the following databases: MEDLINE, Embase, Cochrane  
34 Library, CINAHL, ISI Web of Science and PsycINFO. We will search for studies of  
35 interventions published from inception to 2020 with no language restriction and designed to  
36 compare the impact of telemonitoring of BP with management support (nurses, pharmacist,  
37 physician, health aids, etc) compared to usual care in improving BP control and other  
38 outcomes in non-dialysis CKD patients. The search strategy will be developed after  
39 discussion among reviewers using guidance from the Cochrane handbook.<sup>36</sup> Using controlled  
40 vocabulary, we will adapt the MEDLINE search strategy for other databases. The search  
41 strategy for MEDLINE is shown in Table 3.

#### 42 ***Other sources***

1  
2  
3 We will search the bibliographies of all relevant and selected publications for further  
4 studies and will also search grey literature using recommended resources in consultation with  
5 our medical Librarian. Thus, we will search ProQuest Dissertations & Theses Global, and  
6  
7  
8  
9  
10  
11  
12  
13  
14  
15  
16  
17  
18  
19  
20  
21  
22  
23  
24  
25  
26  
27  
28  
29  
30  
31  
32  
33  
34  
35  
36  
37  
38  
39  
40  
41  
42  
43  
44  
45  
46  
47  
48  
49  
50  
51  
52  
53  
54  
55  
56  
57  
58  
59  
60

We will search the bibliographies of all relevant and selected publications for further studies and will also search grey literature using recommended resources in consultation with our medical Librarian. Thus, we will search ProQuest Dissertations & Theses Global, and Conference Proceedings Citation Index (Clarivate Analytics).

## **Data collection and analysis**

### ***Study selection***

We will use a 2-stage collaborative review process for screening and selection of studies to be included. In the first stage, 2 reviewers (SM and MT) will independently assess the titles/abstracts of retrieved studies to be selected for full text screening if conducted in a non-dialysis CKD population (stage 1 – 5). In the second stage, full texts, having met the above criteria will be obtained for further screening and will be included if HBPT (with or without management support - nurses, pharmacist, physician, health aids, etc) is used as the intervention and the study reports one of the stated outcomes of interest. A third reviewer (IGO) will evaluate any discrepancies, if necessary, and will advise in case of disagreement. We will record all reasons for exclusion and exclude studies not using HBPT as the intervention to improve BP control. Figure 1 is a summary of the process that will be used for study selection. Thus, the inclusion and exclusion criteria for the study will be:

#### ***Inclusion criteria:***

- Studies conducted in a non-dialysis CKD population.
- Studies using HBPT (with or without management support i.e. nurses, pharmacist, physician, health aids, etc) as the intervention.
- Studies reporting on at least one outcome measure (BP change / control, CV outcomes or CKD outcomes, patient-reported outcome measures and patient-reported experience measures)

- 1
- 2
- 3 – Studies that include only patients with CKD and no comparators will be included if
- 4 they meet other inclusion criteria.
- 5
- 6
- 7
- 8 – Publication date (no restriction)
- 9
- 10 – Language restriction (none)
- 11

### 12 ***Exclusion criteria:***

- 13
- 14
- 15 – Studies reporting other forms of ehealth for hypertension control but not involving BP
- 16 telemonitoring.
- 17
- 18
- 19 – Studies in non-CKD population or in patients receiving any form of kidney
- 20 replacement therapies (KRT) (studies including KRT and non-dialysis CKD patients
- 21 will also be excluded if the data of the latter cannot be extrapolated)
- 22
- 23
- 24 – Review articles, editorials, letters to the editor, commentaries, case studies, case
- 25 reports, images and studies in which we are unable to get relevant data even after
- 26 attempts to get these from the authors.
- 27
- 28
- 29 – Studies in which the specific outcomes of interest cannot be clearly identified or
- 30 extrapolated (e.g. studies reporting differences between groups but not providing
- 31 information on the entire group)
- 32
- 33
- 34
- 35
- 36
- 37
- 38
- 39

### 40 ***Data extraction and management***

41 Two reviewers (SM and MT) will independently extract data and summarize the

42 details of selected studies using a standard data extraction sheet. All extracted data will be

43 reviewed for accuracy and completeness. The data items we will collect will include general

44 study characteristics (e.g. study type, publication year country, etc), study design (RCT,

45 observational, case-control study, cohort, etc), type of intervention utilized (HBPT alone or

46 with management support), duration of intervention, outcomes and conclusions. If more than

47 one outcome time (e.g. 12 and 24 months) is reported, the data on the longest follow-up will

48 be extracted.

49

50

51

52

53

54

55

56

57

58

59

60

### ***Assessment of risk of bias in included studies***

Methodological quality will be evaluated using the checklist developed by Hoy et al<sup>37</sup> to assess the risk of bias in primary studies. This quality assessment tool incorporates assessments of risk of bias across core domains including sampling, the sampling technique and size, outcome measurement, response rate, and statistical reporting. We will also present the overall risk of bias per study in a risk of bias summary table and we will examine for publication bias using a funnel plot. If the funnel plot is asymmetrical, we will explore possible causes including publication bias, poor methodological quality and true heterogeneity.

### ***Measures of treatment effect***

We will present the effects on BP between interventions at follow-up (SBP and DBP) according to the HBPT interventions proposed in each study. Dichotomous outcomes will be presented as risk ratios while continuous outcomes will be presented as mean differences (MD) between the change in the intervention and control groups if the outcomes have been measured and reported in the same way across all studies. If the continuous outcomes have been measured in different ways across studies, then we will use the standardized MD between the intervention and control groups. We will present time-to-event outcomes as HR. We will report 95% CIs for all outcomes.

### ***Dealing with missing data***

In the case of missing or unclear data, we will contact the authors to request such information related to study methods, attrition rates and outcomes. Where possible, we will calculate missing data using available relevant information including imputing data, where appropriate. All missing outcome data will also be reported in the data extraction form and risk of bias table.

### ***Assessment of heterogeneity***

1  
2  
3 We will assess heterogeneity among studies in relation to participant characteristics  
4 (diabetic CKD and others), intervention type (HBPT alone or HBPT plus management),  
5 duration and outcome (BP control, CKD progression, death or QoL). We will test statistical  
6 heterogeneity using the  $\chi^2$  test (considering a value of  $p < 0.1$  to indicate heterogeneity) and  
7 estimate the amount of heterogeneity using the  $I^2$  statistic ( $I^2$  values of  $< 25\%$ ,  $25\%$ –  
8  $50\%$  and  $> 50\%$  represent low, medium and high heterogeneity, respectively).<sup>36</sup> We will  
9 assess reasons for heterogeneity through subgroup analysis.

### 19 ***Data synthesis***

21 We will summarize the characteristics of included studies in a table and we will assess  
22 if there is possibility to conduct a meta-analysis. If the characteristics of included studies are  
23 excessively heterogeneous, we will not pool results, but we will only present a narrative  
24 synthesis of the results of group findings by context measures. If a meta-analysis is  
25 conducted, intervention effects will be calculated as relative risks (RR) with 95% CIs for  
26 dichotomous data and we will calculate mean differences (MD) with 95% CIs for continuous  
27 variables. Whether a fixed effects model or a random effects model will be used depends on  
28 the results of the  $\chi^2$  test and  $I^2$  test for heterogeneity. If there is substantial statistical  
29 heterogeneity, we will adopt a random effects model whereas a fixed effects model will be  
30 used if there is no substantial statistical heterogeneity ( $I^2 < 50\%$ ).

### 44 ***Subgroup analysis***

46 Subgroup analysis will be considered according to the following variables: age,  
47 gender, CKD stage, study setting (rural vs urban or low-income and middle-income vs high-  
48 income using the World Bank country classifications by income level)<sup>38</sup> study duration ( $< 6$   
49 months vs  $> 6$  months) and hypertension status (controlled versus uncontrolled).

### 56 ***Patient and public involvement***

58 Patients and public will not be involved at this stage of the project.



### ***Ethics and dissemination***

Ethical approval will not be needed for this study as data used will be extracted from already published studies. Our dissemination strategy will use traditional approaches, including open-access peer-reviewed publication(s), scientific presentations and a report.

### **Discussion**

Hypertension is the leading prognostic maker for risk of adverse health outcomes in patients with CKD, and effective BP control to mitigate this risk remains a challenge. Data on the most optimal way to management patients with hypertension and CKD remains limited. This work will therefore provide new information on the potential role of HBPT in the management of hypertension and reducing adverse health outcomes in comparison with usual care. As telehealth practices and telemonitoring technologies continue to evolve worldwide, this study will demonstrate the impact of HBPT for hypertension monitoring and control as well as its impact on fatal and non-fatal CV events, progression of kidney function, QoL and death in non-dialysis CKD patients. Strengths and limitations of this study will be highlighted in the process of identified evidence.

**Author contributions:**

IGO and AKB were responsible for the conception and design of the work; SM and MMT will carry out the search and IGO will arbitrate any differences, IGO and AKB were responsible for the draft, all authors were involved in critical revision of the draft for important intellectual content and all authors approved the final version. AKB is the guarantor of this protocol.

**Funding:**

Funding for this study was provided through the Alberta Kidney Care- North (formerly, Northern Alberta Renal Program)/AMGEN incorporated Grant: Improving access to care for rural northern CKD patients through eHealth technologies.  
'Award/Grant number is not applicable'

**Competing interests:**

RP is CEO of mmHg Inc., a digital health company creating guideline-concordant innovations to improve the efficiency of remote patient monitoring. All other authors declare no conflict of interest.

**Patient consent:**

Not required.

**Data sharing statement:**

We will make data available on request

**REFERENCES**

1. Williams B, Mancia G, Spiering W, et al. 2018 Practice Guidelines for the management of arterial hypertension of the European Society of Hypertension and the European Society of Cardiology: ESH/ESC Task Force for the Management of Arterial Hypertension. *J Hypertens*. 2018;36(12):2284-2309.
2. Mills KT, Bundy JD, Kelly TN, et al. Global Disparities of Hypertension Prevalence and Control: A Systematic Analysis of Population-Based Studies From 90 Countries. *Circulation*. 2016;134(6):441-450.
3. Glynn LG, Murphy AW, Smith SM, Schroeder K, Fahey T. Interventions used to improve control of blood pressure in patients with hypertension. *The Cochrane database of systematic reviews*. 2010(3):Cd005182.
4. Beaney T, Schutte AE, Stergiou GS, et al. May Measurement Month 2019: The Global Blood Pressure Screening Campaign of the International Society of Hypertension. *Hypertension*. 2020.
5. Molinero A, Ruilope LM, Tous S, et al. May Measurement Month 2017: an analysis of blood pressure screening in Spain-Europe. *Eur Heart J Suppl*. 2019;21(Suppl D):D107-d110.
6. Woodiwiss AJ, Kruger R, Norton GR, et al. May Measurement Month 2017: an analysis of blood pressure screening results in South Africa-Sub-Saharan Africa. *Eur Heart J Suppl*. 2019;21(Suppl D):D104-d106.
7. Muntner P, Anderson A, Charleston J, et al. Hypertension awareness, treatment, and control in adults with CKD: results from the Chronic Renal Insufficiency Cohort (CRIC) Study. *American journal of kidney diseases : the official journal of the National Kidney Foundation*. 2010;55(3):441-451.
8. USRDS. *USRDS 2010 Annual Data Report: Atlas of Chronic Kidney Disease and End-Stage Renal Disease in the United States*, National Institutes of Health, National Institute of Diabetes and Digestive and Kidney Diseases, Bethesda, MD. 2010.
9. KDIGO. Chapter 2: Lifestyle and pharmacological treatments for lowering blood pressure in CKD ND patients. *Kidney International Supplements*. 2012;2(5):347-356.
10. Whelton PK, Carey RM, Aronow WS, et al. 2017 ACC/AHA/AAPA/ABC/ACPM/AGS/APhA/ASH/ASPC/NMA/PCNA Guideline for the Prevention, Detection, Evaluation, and Management of High Blood Pressure in Adults: Executive Summary: A Report of the American College of Cardiology/American Heart Association Task Force on Clinical Practice Guidelines. *Hypertension*. 2018;71(6):1269-1324.
11. Muntner P, Shimbo D, Tonelli M, Reynolds K, Arnett DK, Oparil S. The relationship between visit-to-visit variability in systolic blood pressure and all-cause mortality in the general population: findings from NHANES III, 1988 to 1994. *Hypertension*. 2011;57(2):160-166.
12. Parati G, Ochoa JE, Lombardi C, Bilo G. Blood pressure variability: assessment, predictive value, and potential as a therapeutic target. *Curr Hypertens Rep*. 2015;17(4):537.

13. Mallamaci F, Tripepi G, D'Arrigo G, et al. Blood Pressure Variability, Mortality, and Cardiovascular Outcomes in CKD Patients. *Clinical journal of the American Society of Nephrology : CJASN*. 2019;14(2):233-240.
14. Whittle J, Lynch AI, Tanner RM, et al. Visit-to-Visit Variability of BP and CKD Outcomes: Results from the ALLHAT. *Clinical journal of the American Society of Nephrology : CJASN*. 2016;11(3):471-480.
15. Borrelli S, Garofalo C, Mallamaci F, et al. Short-term blood pressure variability in nondialysis chronic kidney disease patients: correlates and prognostic role on the progression of renal disease. *J Hypertens*. 2018;36(12):2398-2405.
16. Wan EYF, Yu EYT, Chin WY, Fong DYT, Choi EPH, Lam CLK. Association of visit-to-visit variability of systolic blood pressure with cardiovascular disease, chronic kidney disease and mortality in patients with hypertension. *J Hypertens*. 2020;38(5):943-953.
17. Sega R, Facchetti R, Bombelli M, et al. Prognostic value of ambulatory and home blood pressures compared with office blood pressure in the general population: follow-up results from the Pressioni Arteriose Monitorate e Loro Associazioni (PAMELA) study. *Circulation*. 2005;111(14):1777-1783.
18. Ohkubo T, Imai Y, Tsuji I, et al. Home blood pressure measurement has a stronger predictive power for mortality than does screening blood pressure measurement: a population-based observation in Ohasama, Japan. *J Hypertens*. 1998;16(7):971-975.
19. Ward AM, Takahashi O, Stevens R, Heneghan C. Home measurement of blood pressure and cardiovascular disease: systematic review and meta-analysis of prospective studies. *J Hypertens*. 2012;30(3):449-456.
20. Omboni S, Ferrari R. The role of telemedicine in hypertension management: focus on blood pressure telemonitoring. *Curr Hypertens Rep*. 2015;17(4):535.
21. Parati G, Pellegrini D, Torlasco C. How Digital Health Can Be Applied for Preventing and Managing Hypertension. *Curr Hypertens Rep*. 2019;21(5):40.
22. Iellamo F, Sposato B, Volterrani M. Telemonitoring for the Management of Patients with Heart Failure. *Card Fail Rev*. 2020;6:e07.
23. Chen C, Wang J, Pang L, Wang Y, Ma G, Liao W. Telemonitor care helps CPAP compliance in patients with obstructive sleep apnea: a systemic review and meta-analysis of randomized controlled trials. *Ther Adv Chronic Dis*. 2020;11:2040622320901625.
24. Franc S, Hanaire H, Benhamou PY, et al. DIABEO System Combining a Mobile App Software with and without Telemonitoring versus Standard Care: A Randomized Controlled Trial in Diabetic Patients Poorly Controlled with a Basal-Bolus Insulin Regimen. *Diabetes Technol Ther*. 2020.
25. Margolis KL, Asche SE, Dehmer SP, et al. Long-term Outcomes of the Effects of Home Blood Pressure Telemonitoring and Pharmacist Management on Blood Pressure Among Adults With Uncontrolled Hypertension: Follow-up of a Cluster Randomized Clinical Trial. *JAMA network open*. 2018;1(5):e181617.
26. Omboni S, Gazzola T, Carabelli G, Parati G. Clinical usefulness and cost effectiveness of home blood pressure telemonitoring: meta-analysis of randomized controlled studies. *J Hypertens*. 2013;31(3):455-467; discussion 467-458.

- 1
  - 2
  - 3
  - 4
  - 5
  - 6
  - 7
  - 8
  - 9
  - 10
  - 11
  - 12
  - 13
  - 14
  - 15
  - 16
  - 17
  - 18
  - 19
  - 20
  - 21
  - 22
  - 23
  - 24
  - 25
  - 26
  - 27
  - 28
  - 29
  - 30
  - 31
  - 32
  - 33
  - 34
  - 35
  - 36
  - 37
  - 38
  - 39
  - 40
  - 41
  - 42
  - 43
  - 44
  - 45
  - 46
  - 47
  - 48
  - 49
  - 50
  - 51
  - 52
  - 53
  - 54
  - 55
  - 56
  - 57
  - 58
  - 59
  - 60
27. Bray EP, Jones MI, Banting M, et al. Performance and persistence of a blood pressure self-management intervention: telemonitoring and self-management in hypertension (TASMINH2) trial. *J Hum Hypertens*. 2015;29(7):436-441.
28. Jones MI, Greenfield SM, Bray EP, et al. Patients' experiences of self-monitoring blood pressure and self-titration of medication: the TASMINH2 trial qualitative study. *Br J Gen Pract*. 2012;62(595):e135-142.
29. McManus RJ, Mant J, Franssen M, et al. Efficacy of self-monitored blood pressure, with or without telemonitoring, for titration of antihypertensive medication (TASMINH4): an unmasked randomised controlled trial. *Lancet (London, England)*. 2018;391(10124):949-959.
30. Monahan M, Jowett S, Nickless A, et al. Cost-Effectiveness of Telemonitoring and Self-Monitoring of Blood Pressure for Antihypertensive Titration in Primary Care (TASMINH4). *Hypertension*. 2019;73(6):1231-1239.
31. Duan Y, Xie Z, Dong F, et al. Effectiveness of home blood pressure telemonitoring: a systematic review and meta-analysis of randomised controlled studies. *J Hum Hypertens*. 2017;31(7):427-437.
32. He T, Liu X, Li Y, Wu Q, Liu M, Yuan H. Remote home management for chronic kidney disease: A systematic review. *J Telemed Telecare*. 2017;23(1):3-13.
33. Makhija D, Alscher MD, Becker S, et al. Remote Monitoring of Automated Peritoneal Dialysis Patients: Assessing Clinical and Economic Value. *Telemedicine journal and e-health : the official journal of the American Telemedicine Association*. 2018;24(4):315-323.
34. Luo L, Ye M, Tan J, et al. Telehealth for the management of blood pressure in patients with chronic kidney disease: A systematic review. *J Telemed Telecare*. 2019;25(2):80-92.
35. Moher D, Shamseer L, Clarke M, et al. Preferred reporting items for systematic review and meta-analysis protocols (PRISMA-P) 2015 statement. *Systematic Reviews*. 2015;4(1):1.
36. Higgins JPT TJ, Chandler J, Cumpston M, Li T, Page MJ, Welch VA. *Cochrane Handbook for Systematic Reviews of Interventions version 6.0 (updated July 2019)*. . Cochrane, 2019. ; 2019.
37. Hoy D, Brooks P, Woolf A, et al. Assessing risk of bias in prevalence studies: modification of an existing tool and evidence of interrater agreement. *Journal of clinical epidemiology*. 2012;65(9):934-939.
38. WorldBank. World Bank Open Data. <http://data.worldbank.org/indicator>. Published 2020. Accessed.

Table 1: Definition and classification of hypertension (ESH) <sup>1</sup>

| Category                       | SBP (mmHg) |        | DBP (mmHg) |
|--------------------------------|------------|--------|------------|
| Optimal                        | < 120      | and    | < 80       |
| Normal                         | 120 – 129  | and/or | 80 – 84    |
| High normal                    | 130 – 139  | and/or | 85 – 89    |
| Grade 1 hypertension           | 140 – 159  | and/or | 90 – 99    |
| Grade 2 hypertension           | 160 – 179  | and/or | 100 – 109  |
| Grade 3 hypertension           | ≥ 180      | and/or | ≥ 110      |
| Isolated systolic hypertension | ≥ 140      | and    | < 90       |
| Office BP                      | ≥ 140      | and/or | ≥ 90       |
| Ambulatory BP                  |            |        |            |
| – Daytime (or awake) mean      | ≥ 135      | and/or | ≥ 85       |
| – Night-time (or asleep) mean  | ≥ 120      | and/or | ≥ 70       |
| – 24-hour mean                 | ≥ 130      | and/or | ≥ 80       |
| Home BP mean                   | ≥ 135      | and/or | ≥ 85       |

BP – Blood pressure, SBP – systolic blood pressure, DBP – diastolic blood pressure, ESH – European Society of Hypertension

Table 2: Comparison between a previous systematic review and this study

| Features            | Luo et al <sup>34</sup>                                                                                                                                                                                                                                                                                                                                                               | This study                                                                                                                                                                                                                                                                                                                                                                                                                                                                                                                                                                                                                                                                                      |
|---------------------|---------------------------------------------------------------------------------------------------------------------------------------------------------------------------------------------------------------------------------------------------------------------------------------------------------------------------------------------------------------------------------------|-------------------------------------------------------------------------------------------------------------------------------------------------------------------------------------------------------------------------------------------------------------------------------------------------------------------------------------------------------------------------------------------------------------------------------------------------------------------------------------------------------------------------------------------------------------------------------------------------------------------------------------------------------------------------------------------------|
| Study design        | Systematic review                                                                                                                                                                                                                                                                                                                                                                     | Systematic review (with possible meta-analysis if there is sufficient homogeneity of included studies to allow this)                                                                                                                                                                                                                                                                                                                                                                                                                                                                                                                                                                            |
| End of study search | 2017                                                                                                                                                                                                                                                                                                                                                                                  | 2020                                                                                                                                                                                                                                                                                                                                                                                                                                                                                                                                                                                                                                                                                            |
| Population          | CKD (stage 3 – 5)                                                                                                                                                                                                                                                                                                                                                                     | Non-dialysis CKD (stage 1 – 5)                                                                                                                                                                                                                                                                                                                                                                                                                                                                                                                                                                                                                                                                  |
| Inclusion criteria  | (1) CKD 3-5 patients over the age of 18;<br>(2) Administered telemedicine to intervention groups;<br>(3) Randomised controlled trials (RCTs) or quasi-randomised controlled trials (qRCTs);<br>(4) Reported at least one main outcome including SBP, diastolic blood pressure (DBP) or mean arterial pressure (MAP).                                                                  | CKD 1 – 5 patients over the age of 18<br>Will use home BP telemonitoring as intervention for BP control (including studies using additional non-telemonitoring management approaches e.g. nurses, pharmacists, counseling, education or behavioral methods)<br>All study designs will be eligible for inclusion including time series studies, before/after studies, non-traditional comparison studies, clinical trials as well previously published reviews<br>Reported at least one outcome including achievement of guideline-concordant targets on BP control, progression of CKD (eGFR, proteinuria criteria), hospitalizations, cost reduction, incident CVD, and quality of life (QoL). |
| Exclusion criteria  | (1) Studies including patients on renal replacement therapy;<br>(2) Studies using additional non-telemedicine approaches such as face-to-face education or nutritional guidance in the multifactorial intervention for the intervention group;<br>(3) Studies that were not reported in either English or Chinese;<br>(4) Studies with inaccessible or incomplete crucial information | CKD patient on KRT (dialysis or kidney transplantation)<br>No language restriction<br>Studies with inaccessible or incomplete information                                                                                                                                                                                                                                                                                                                                                                                                                                                                                                                                                       |
| Intervention        | Telehealth / telemedicine                                                                                                                                                                                                                                                                                                                                                             | Home BP telemonitoring with or without management support (nurses, pharmacist, physician, health aids, etc)                                                                                                                                                                                                                                                                                                                                                                                                                                                                                                                                                                                     |
| Comparator          | Usual / standard of care                                                                                                                                                                                                                                                                                                                                                              | Usual / standard of care or other modes of eHealth used for comparison with HBPT                                                                                                                                                                                                                                                                                                                                                                                                                                                                                                                                                                                                                |
| Outcome(s)          | SBP, DBP, MAP, estimated glomerular filtration rate (eGFR), creatinine, blood pressure control rate,                                                                                                                                                                                                                                                                                  | BP control (SBP, DBP, MAP), progression of CKD (eGFR, serum creatinine, proteinuria criteria), hospitalizations, incident CVD and QoL                                                                                                                                                                                                                                                                                                                                                                                                                                                                                                                                                           |

CKD – chronic kidney disease, CVD – cardiovascular disease, HBPT – Home blood pressure telemonitoring, SBP – systolic blood pressure, DBP – diastolic blood pressure, KRT – Kidney replacement therapy, eGFR – estimated glomerular filtration rate

**Table 3: MEDLINE search terms and strategy**

| #  | Search term                                  | #  | Search term                                                                  |
|----|----------------------------------------------|----|------------------------------------------------------------------------------|
| 1  | exp Hypertension/                            | 34 | (consult* and (skype or facetime or internet)).mp.                           |
| 2  | hypertens*.mp.                               | 35 | ((distan* or remote* or video*) adj2 (consult* or deliver* or diagnos*)).mp. |
| 3  | exp Blood Pressure/                          | 36 | ehealth*.mp.                                                                 |
| 4  | blood pressure*.mp                           | 37 | tele care.mp.                                                                |
| 5  | arter* pressure*.mp.                         | 38 | tele collaborat*.mp.                                                         |
| 6  | venous pressure*.mp.                         | 39 | tele consult*.mp.                                                            |
| 7  | vein pressure*.mp.                           | 40 | tele conference*.mp.                                                         |
| 8  | exp Blood Pressure Determination/            | 41 | tele health.mp.                                                              |
| 9  | 1 or 2 or 3 or 4 or 5 or 6 or 7 or 8         | 42 | tele guide*.mp.                                                              |
| 10 | exp Renal Insufficiency, Chronic/            | 43 | tele diagnos*.mp.                                                            |
| 11 | Chronic Kidney disease*.mp.                  | 44 | tele med*.mp.                                                                |
| 12 | chronic kidney insufficienc*.mp.             | 45 | tele monitor*.mp.                                                            |
| 13 | chronic renal disease*.mp.                   | 46 | tele presence*.mp.                                                           |
| 14 | chronic renal insufficienc*.mp.              | 47 | tele robotic*.mp.                                                            |
| 15 | CKD.mp.                                      | 48 | tele screen*.mp.                                                             |
| 16 | Renal fail*.mp.                              | 49 | tele transmi*.mp.                                                            |
| 17 | Kidney fail*.mp.                             | 50 | (teletherap* not (x-ray or radiat* or cobalt or gamma* or cesium)).mp.       |
| 18 | 10 or 11 or 12 or 13 or 14 or 15 or 16 or 17 | 51 | telemetry/                                                                   |
| 19 | exp Telemedicine/                            | 52 | telemetry.mp.                                                                |
| 20 | telecare.mp.                                 | 53 | Telemetries.mp.                                                              |
| 21 | telecollaborat*.mp.                          | 54 | telenurs*.mp.                                                                |
| 22 | teleconsult*.mp.                             | 55 | telephone/                                                                   |
| 23 | teleconference*.mp.                          | 56 | Telephon*.mp.                                                                |
| 24 | telehealth.mp.                               | 57 | smartphone/                                                                  |
| 25 | teleguide*.mp.                               | 58 | smartphone*.mp.                                                              |
| 26 | telediagnos*.mp.                             | 59 | Cell phone/                                                                  |
| 27 | telemed*.mp.                                 | 60 | cellphone*.mp                                                                |
| 28 | telemonitor*.mp                              | 61 | cell* phone*.mp                                                              |
| 29 | telepresence*.mp.                            | 62 | internet/                                                                    |
| 30 | telerehab*.mp.                               | 63 | internet*.mp.                                                                |
| 31 | telerobotic*.mp.                             | 64 | or/19-63                                                                     |
| 32 | telescreen*.mp.                              | 65 | 9 and 18 and 64                                                              |
| 33 | teletransmi*.mp.                             |    |                                                                              |



**Figure 1: PRISMA flow chart for process of study selection**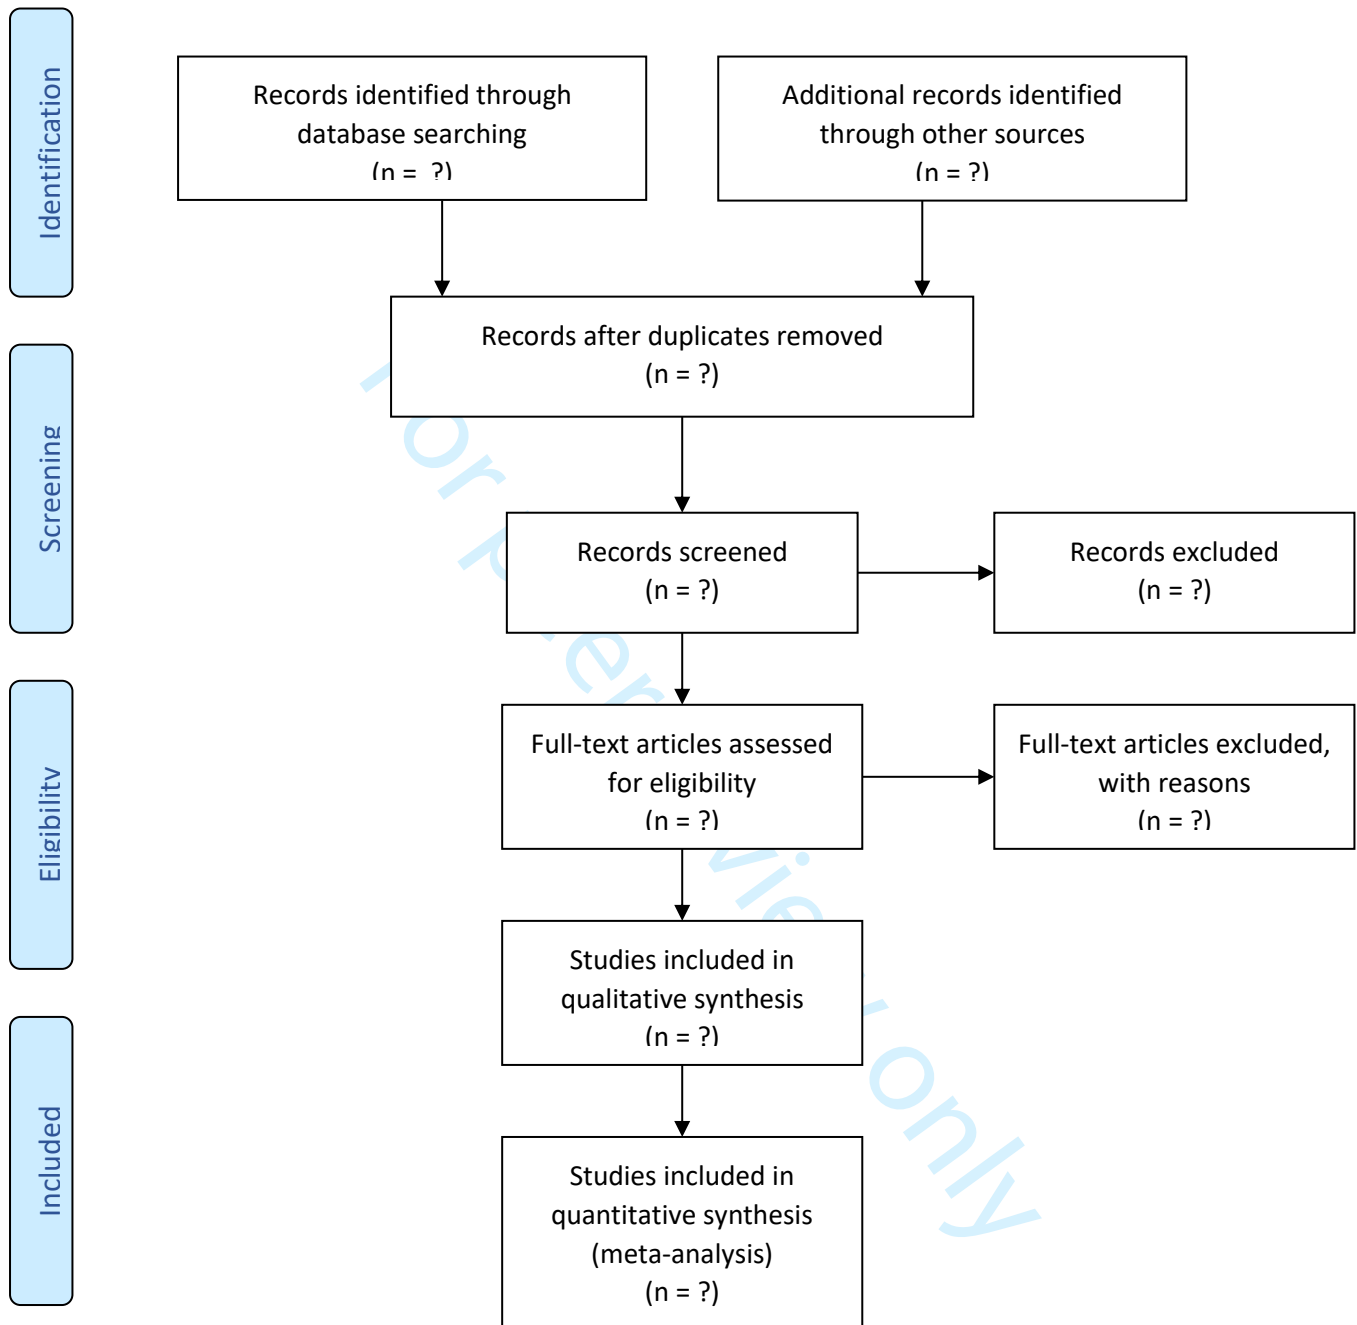

# Reporting checklist for protocol of a systematic review.

Based on the PRISMA-P guidelines.

## Instructions to authors

Complete this checklist by entering the page numbers from your manuscript where readers will find each of the items listed below.

Your article may not currently address all the items on the checklist. Please modify your text to include the missing information. If you are certain that an item does not apply, please write "n/a" and provide a short explanation.

Upload your completed checklist as an extra file when you submit to a journal.

In your methods section, say that you used the PRISMA-Preporting guidelines, and cite them as:

Moher D, Shamseer L, Clarke M, Ghersi D, Liberati A, Petticrew M, Shekelle P, Stewart LA. Preferred Reporting Items for Systematic Review and Meta-Analysis Protocols (PRISMA-P) 2015 statement. *Syst Rev.* 2015;4(1):1.

|                     | Reporting Item                                                                                                                                                                                                     | Page Number                  |
|---------------------|--------------------------------------------------------------------------------------------------------------------------------------------------------------------------------------------------------------------|------------------------------|
| <b>Title</b>        |                                                                                                                                                                                                                    | 1                            |
| Identification      | <a href="#">#1a</a> Identify the report as a protocol of a systematic review                                                                                                                                       | 1                            |
| Update              | <a href="#">#1b</a> If the protocol is for an update of a previous systematic review, identify as such                                                                                                             | N/A                          |
| <b>Registration</b> |                                                                                                                                                                                                                    |                              |
|                     | <a href="#">#2</a> If registered, provide the name of the registry (such as PROSPERO) and registration number                                                                                                      | (PROSPERO)<br>CRD42020190705 |
| <b>Authors</b>      |                                                                                                                                                                                                                    |                              |
| Contact             | <a href="#">#3a</a> Provide name, institutional affiliation, e-mail address of all protocol authors; provide physical mailing address of corresponding author                                                      | 1                            |
| Contribution        | <a href="#">#3b</a> Describe contributions of protocol authors and identify the guarantor of the review                                                                                                            | 15                           |
| <b>Amendments</b>   |                                                                                                                                                                                                                    |                              |
|                     | <a href="#">#4</a> If the protocol represents an amendment of a previously completed or published protocol, identify as such and list changes; otherwise, state plan for documenting important protocol amendments | N/A                          |
| <b>Support</b>      |                                                                                                                                                                                                                    |                              |
| Sources             | <a href="#">#5a</a> Indicate sources of financial or other support for the review                                                                                                                                  | 15                           |
| Sponsor             | <a href="#">#5b</a> Provide name for the review funder and / or sponsor                                                                                                                                            | 15                           |

|    |                      |                      |                                                                                               |        |
|----|----------------------|----------------------|-----------------------------------------------------------------------------------------------|--------|
| 1  | Role of sponsor or   | <a href="#">#5c</a>  | Describe roles of funder(s), sponsor(s), and / or institution(s), if any, in                  | 15     |
| 2  | funder               |                      | developing the protocol                                                                       |        |
| 3  | <b>Introduction</b>  |                      |                                                                                               |        |
| 4  | Rationale            | <a href="#">#6</a>   | Describe the rationale for the review in the context of what is already known                 | 6      |
| 5  | Objectives           | <a href="#">#7</a>   | Provide an explicit statement of the question(s) the review will address with                 | 7      |
| 6  |                      |                      | reference to participants, interventions, comparators, and outcomes (PICO)                    |        |
| 7  |                      |                      |                                                                                               |        |
| 8  | <b>Methods</b>       |                      |                                                                                               |        |
| 9  | Eligibility criteria | <a href="#">#8</a>   | Specify the study characteristics (such as PICO, study design, setting, time                  | 8 - 10 |
| 10 |                      |                      | frame) and report characteristics (such as years considered, language,                        |        |
| 11 |                      |                      | publication status) to be used as criteria for eligibility for the review                     |        |
| 12 |                      |                      |                                                                                               |        |
| 13 | Information sources  | <a href="#">#9</a>   | Describe all intended information sources (such as electronic databases,                      | 10     |
| 14 |                      |                      | contact with study authors, trial registers or other grey literature sources)                 |        |
| 15 |                      |                      | with planned dates of coverage                                                                |        |
| 16 |                      |                      |                                                                                               |        |
| 17 | Search strategy      | <a href="#">#10</a>  | Present draft of search strategy to be used for at least one electronic                       | 21     |
| 18 |                      |                      | database, including planned limits, such that it could be repeated                            |        |
| 19 |                      |                      |                                                                                               |        |
| 20 | Study records - data | <a href="#">#11a</a> | Describe the mechanism(s) that will be used to manage records and data                        | 12 -13 |
| 21 | management           |                      | throughout the review                                                                         |        |
| 22 |                      |                      |                                                                                               |        |
| 23 | Study records -      | <a href="#">#11b</a> | State the process that will be used for selecting studies (such as two                        | 10     |
| 24 | selection process    |                      | independent reviewers) through each phase of the review (that is, screening,                  |        |
| 25 |                      |                      | eligibility and inclusion in meta-analysis)                                                   |        |
| 26 |                      |                      |                                                                                               |        |
| 27 | Study records - data | <a href="#">#11c</a> | Describe planned method of extracting data from reports (such as piloting                     | 11     |
| 28 | collection process   |                      | forms, done independently, in duplicate), any processes for obtaining and                     |        |
| 29 |                      |                      | confirming data from investigators                                                            |        |
| 30 |                      |                      |                                                                                               |        |
| 31 | Data items           | <a href="#">#12</a>  | List and define all variables for which data will be sought (such as PICO items,              | 12     |
| 32 |                      |                      | funding sources), any pre-planned data assumptions and simplifications                        |        |
| 33 |                      |                      |                                                                                               |        |
| 34 | Outcomes and         | <a href="#">#13</a>  | List and define all outcomes for which data will be sought, including                         | 11, 20 |
| 35 | prioritization       |                      | prioritization of main and additional outcomes, with rationale                                |        |
| 36 |                      |                      |                                                                                               |        |
| 37 | Risk of bias in      | <a href="#">#14</a>  | Describe anticipated methods for assessing risk of bias of individual studies,                | 12     |
| 38 | individual studies   |                      | including whether this will be done at the outcome or study level, or both;                   |        |
| 39 |                      |                      | state how this information will be used in data synthesis                                     |        |
| 40 |                      |                      |                                                                                               |        |
| 41 | Data synthesis       | <a href="#">#15a</a> | Describe criteria under which study data will be quantitatively synthesised                   | 12     |
| 42 | Data synthesis       | <a href="#">#15b</a> | If data are appropriate for quantitative synthesis, describe planned summary                  | 13     |
| 43 |                      |                      | measures, methods of handling data and methods of combining data from                         |        |
| 44 |                      |                      | studies, including any planned exploration of consistency (such as I <sup>2</sup> , Kendall's |        |
| 45 |                      |                      | τ)                                                                                            |        |
| 46 |                      |                      |                                                                                               |        |
| 47 | Data synthesis       | <a href="#">#15c</a> | Describe any proposed additional analyses (such as sensitivity or subgroup                    | 13     |
| 48 |                      |                      | analyses, meta-regression)                                                                    |        |
| 49 |                      |                      |                                                                                               |        |
| 50 | Data synthesis       | <a href="#">#15d</a> | If quantitative synthesis is not appropriate, describe the type of summary                    | 13     |
| 51 |                      |                      | planned                                                                                       |        |
| 52 |                      |                      |                                                                                               |        |
| 53 | Meta-bias(es)        | <a href="#">#16</a>  | Specify any planned assessment of meta-bias(es) (such as publication bias                     | N/A    |
| 54 |                      |                      | across studies, selective reporting within studies)                                           |        |
| 55 | Confidence in        | <a href="#">#17</a>  | Describe how the strength of the body of evidence will be assessed (such as                   | 13     |
| 56 | cumulative evidence  |                      | GRADE)                                                                                        |        |
| 57 |                      |                      |                                                                                               |        |
| 58 |                      |                      |                                                                                               |        |
| 59 |                      |                      |                                                                                               |        |
| 60 |                      |                      |                                                                                               |        |

1 None The PRISMA-P checklist is distributed under the terms of the Creative Commons Attribution License CC-BY 4.0. This checklist can be completed  
2 online using <https://www.goodreports.org/>, a tool made by the [EQUATOR Network](#) in collaboration with [Penelope.ai](#)  
3  
4  
5  
6  
7  
8  
9  
10  
11  
12  
13  
14  
15  
16  
17  
18  
19  
20  
21  
22  
23  
24  
25  
26  
27  
28  
29  
30  
31  
32  
33  
34  
35  
36  
37  
38  
39  
40  
41  
42  
43  
44  
45  
46  
47  
48  
49  
50  
51  
52  
53  
54  
55  
56  
57  
58  
59  
60

For peer review only

# BMJ Open

## Impact of Home Telemonitoring and Management Support on Blood Pressure Control in Non-dialysis CKD: A Systematic Review Protocol.

|                                 |                                                                                                                                                                                                                                                                                                                                                                                                                                                                                                                                                                                                                                                                                                                                                                                                                                                                                                                                                     |
|---------------------------------|-----------------------------------------------------------------------------------------------------------------------------------------------------------------------------------------------------------------------------------------------------------------------------------------------------------------------------------------------------------------------------------------------------------------------------------------------------------------------------------------------------------------------------------------------------------------------------------------------------------------------------------------------------------------------------------------------------------------------------------------------------------------------------------------------------------------------------------------------------------------------------------------------------------------------------------------------------|
| Journal:                        | <i>BMJ Open</i>                                                                                                                                                                                                                                                                                                                                                                                                                                                                                                                                                                                                                                                                                                                                                                                                                                                                                                                                     |
| Manuscript ID                   | bmjopen-2020-044195.R1                                                                                                                                                                                                                                                                                                                                                                                                                                                                                                                                                                                                                                                                                                                                                                                                                                                                                                                              |
| Article Type:                   | Protocol                                                                                                                                                                                                                                                                                                                                                                                                                                                                                                                                                                                                                                                                                                                                                                                                                                                                                                                                            |
| Date Submitted by the Author:   | 29-Mar-2021                                                                                                                                                                                                                                                                                                                                                                                                                                                                                                                                                                                                                                                                                                                                                                                                                                                                                                                                         |
| Complete List of Authors:       | Okpechi, Ikechi G ; University of Cape Town, Division of Nephrology and Hypertension; University of Alberta, Edmonton, Alberta, Canada. , Medicine<br>Muneer, Shezel; University of Alberta, Edmonton, Alberta, Canada. , Medicine<br>Tinwala, Mohammed; University of Alberta, Edmonton, Alberta, Canada. , Medicine<br>Zaidi, Deenaz; University of Alberta, Edmonton, Alberta, Canada. , Medicine<br>Hamonic, Laura; University of Alberta, John W. Scott Health Sciences Library<br>Braam, Branko; University of Alberta Faculty of Medicine and Dentistry, Nephrology<br>Jindal, Kailash<br>Klarenbach, Scott; University of Alberta, Edmonton, Alberta, Canada. , Medicine<br>Padwal, Raj S ; University of Alberta,<br>Shojai, Soroush ; University of Alberta Faculty of Medicine and Dentistry, ;<br>Thompson, Stephanie; University of Alberta, Nephrology<br>Bello, A; University of Alberta Faculty of Medicine and Dentistry, Medicine |
| <b>Primary Subject Heading</b>: | Renal medicine                                                                                                                                                                                                                                                                                                                                                                                                                                                                                                                                                                                                                                                                                                                                                                                                                                                                                                                                      |
| Secondary Subject Heading:      | Cardiovascular medicine                                                                                                                                                                                                                                                                                                                                                                                                                                                                                                                                                                                                                                                                                                                                                                                                                                                                                                                             |
| Keywords:                       | Hypertension < CARDIOLOGY, Chronic renal failure < NEPHROLOGY, Kidney & urinary tract disorders < UROLOGY                                                                                                                                                                                                                                                                                                                                                                                                                                                                                                                                                                                                                                                                                                                                                                                                                                           |
|                                 |                                                                                                                                                                                                                                                                                                                                                                                                                                                                                                                                                                                                                                                                                                                                                                                                                                                                                                                                                     |

SCHOLARONE™  
Manuscripts

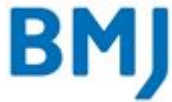

I, the Submitting Author has the right to grant and does grant on behalf of all authors of the Work (as defined in the below author licence), an exclusive licence and/or a non-exclusive licence for contributions from authors who are: i) UK Crown employees; ii) where BMJ has agreed a CC-BY licence shall apply, and/or iii) in accordance with the terms applicable for US Federal Government officers or employees acting as part of their official duties; on a worldwide, perpetual, irrevocable, royalty-free basis to BMJ Publishing Group Ltd ("BMJ") its licensees and where the relevant Journal is co-owned by BMJ to the co-owners of the Journal, to publish the Work in this journal and any other BMJ products and to exploit all rights, as set out in our [licence](#).

The Submitting Author accepts and understands that any supply made under these terms is made by BMJ to the Submitting Author unless you are acting as an employee on behalf of your employer or a postgraduate student of an affiliated institution which is paying any applicable article publishing charge ("APC") for Open Access articles. Where the Submitting Author wishes to make the Work available on an Open Access basis (and intends to pay the relevant APC), the terms of reuse of such Open Access shall be governed by a Creative Commons licence – details of these licences and which [Creative Commons](#) licence will apply to this Work are set out in our licence referred to above.

Other than as permitted in any relevant BMJ Author's Self Archiving Policies, I confirm this Work has not been accepted for publication elsewhere, is not being considered for publication elsewhere and does not duplicate material already published. I confirm all authors consent to publication of this Work and authorise the granting of this licence.

**Title:** Impact of Home Telemonitoring and Management Support on Blood Pressure Control  
in Non-dialysis CKD: A Systematic Review Protocol.

**Authors:**

Ikechi G. Okpechi;<sup>1,2,3</sup> Shezel Muneer;<sup>1</sup> Mohammed M. Tinwala;<sup>1</sup> Deenaz Zaidi; Laura N.  
Hamonc;<sup>4</sup> Branko Braam,<sup>1</sup> Kailash Jindal;<sup>1</sup> Scott Klarenbach;<sup>1</sup> Raj Padwal;<sup>1</sup> Soroush  
Shojai;<sup>1</sup> Stephanie Thompson;<sup>1</sup> Aminu K. Bello<sup>1</sup>

**Author Affiliation:**

- 1- Division of Nephrology and Immunology, Faculty of Medicine and Dentistry,  
University of Alberta, Edmonton, Alberta, Canada
- 2- Division of Nephrology and Hypertension, University of Cape Town, South Africa
- 3- Kidney and Hypertension Research Unit, University of Cape Town, South Africa
- 4- John W. Scott Health Sciences Library, University of Alberta, Edmonton, Alberta,  
Canada.

**Address for correspondence:**

**Name:** Aminu K. Bello

**Address:** Division of Nephrology and Immunology, Faculty of Medicine and Dentistry,  
University of Alberta, Edmonton, Alberta, Canada

**Email:** aminu1@ualberta.ca

**Abstract word count:** 249

**Manuscript word count:** 3,358

**Running Title:** Home BP telemonitoring in CKD

**Keywords:** CKD, hypertension, blood pressure control, telemonitoring, eHealth,  
management support

## Abstract

### *Introduction:*

Hypertension is a common public health problem and a key modifiable risk factor for cardiovascular (CV) and chronic kidney disease (CKD). Home blood pressure (BP) telemonitoring (HBPT) and management is associated with improved BP control, accelerated delivery of care and decision-making strategies that can reduce adverse outcomes associated with hypertension. The aim of this paper is to describe the protocol for a systematic review to assess the impact of HBPT interventions used for improving BP control and reducing CV and kidney outcomes in non-dialysis CKD patients.

### *Methods:*

We developed this protocol using the Preferred Reporting Items for Systematic reviews and Meta-Analyses for Protocols 2015 (PRISMA-P 2015). We will search empirical databases such as MEDLINE, Embase, Cochrane Library, CINAHL, Web of Science and PsycINFO and grey literature for studies conducted in non-dialysis CKD patients on interventions using HBPT and reporting outcomes related to BP control and other outcomes such as CV events and kidney disease progression. All studies meeting these criteria, in adults and published from inception until 2020 with no language barrier will be included.

### *Ethics and dissemination:*

Ethical approval will not be required for this review as the data used will be extracted from already published studies with publicly accessible data. As this study will assess the impact of HBPT on BP control in non-dialysis CKD patients, evidence gathered through it will be disseminated using traditional approaches that includes open-access peer-reviewed publication, scientific presentations and a report. We will also disseminate our findings to appropriate government agencies.



**Strengths and limitations of this protocol:**

- This study will assess the impact of home blood pressure telemonitoring (HBPT) on cardiovascular (CV) and kidney-related outcomes in non-dialysis CKD patients.
- Focus on non-dialysis CKD population is to reduce biases induced by recurrent hemodynamic changes with salt retention and volume status in CKD patients receiving dialysis, and lack of a standardized BP target in patients on dialysis.
- The key outcomes of interest include changes in blood pressure control, progression of CKD (eGFR, proteinuria criteria), hospitalizations, incident fatal and non-fatal CV events, all-cause mortality, cost effectiveness, patient-reported outcome measures and patient-reported experience measures.
- We will assess the quality of studies using a tool that incorporates assessments of risk of bias across core study domains: sampling, sampling technique and size, outcome measurement, response rate, and statistical reporting.
- A potential limitation of this study could be heterogeneity and number of studies of low quality which could affect pooled estimates and our ability to conduct a meta-analysis.

## Introduction

Hypertension, also known as raised or high blood pressure (BP), is a prevalent global public health problem and an important modifiable risk factor for cardiovascular disease (CVD) and chronic kidney disease (CKD). Hypertension is defined as office systolic BP (SBP) values  $\geq 140$  mmHg and/or diastolic BP (DBP) values  $\geq 90$  mmHg (Table 1).<sup>1</sup> The prevalence of hypertension in the global adult population was estimated to be 31.1% (95% CI: 30.0% - 32.2%) in 2010, representing 1.38 billion people who were affected worldwide.<sup>2</sup> Notwithstanding the extensive availability of effective treatment options, BP control remains sub-optimal, especially in low- and middle-income countries for reasons that includes poor-adherence, clinical inertia, and organizational failure.<sup>2,3</sup> A number of interventions have been targeted at improving medications adherence, as it is a major reason for poor BP control, including those at physician level (e.g. improving counselling and education), patient level (e.g. self-monitoring of BP) and at healthcare system level (e.g. support to the development of monitoring systems).<sup>1</sup>

Some of the major challenges with care in hypertension relates to the proportion of people who are aware (diagnosed), receiving treatment or those treated who have achieved control to target of their BP. Data from the International Society of Hypertension (ISH) screening program (May Measurement Month [MMM]) in 2019 showed that of 1.5 million people who were screened for hypertension, 32.0% had never had a BP measurement before and 34.0% had hypertension. Of those identified to be hypertensives, 58.7% were aware, 54.7% were on treatment, 31.7% were controlled to  $<140/90$  mmHg and 23.3% had untreated, or inadequately treated hypertension.<sup>4</sup> The results of previous ISH regional screening programs for MMM support this global trend.<sup>5,6</sup> The low proportion of patients with hypertension who are controlled, suggests a need for practical and sustainable models to

1  
2  
3 improve BP control at the population level in order to reduce the excess risk of CVD and  
4  
5 other target organ damage associated with hypertension.  
6

## 7 **Hypertension in CKD**

8  
9  
10 Hypertension is a common cause of CKD and highly prevalent among patients with  
11  
12 CKD with an increased incidence and prevalence as kidney function declines. Hypertension  
13  
14 is present in as high as 87.5% of CKD patients compared with only 28.5% of patients in the  
15  
16 general population.<sup>7</sup> The United States Renal Data System (USRDS) reports that  
17  
18 hypertension is present in about 23.3% of the general population without CKD and in patients  
19  
20 with CKD, occurs in 35.8% (stage 1), 48.1% (stage 2), 59.9% (stage 3), and 84.1% (stages 4  
21  
22 and 5).<sup>8</sup> Guideline recommendations for diagnosing, monitoring and treating hypertension in  
23  
24 the general population and in patients with CKD are frequently revised and updated.<sup>1,9,10</sup> The  
25  
26 KDIGO guideline on management of BP in CKD recommends the use of lifestyle  
27  
28 modifications and pharmacological treatments for lowering BP in non-dialysis CKD patients.  
29  
30 These measures include individualizing BP targets with the use of various BP lowering  
31  
32 agents, achieving and maintaining a healthy weight (BMI 20 – 25kg/m<sup>2</sup>), lowering salt intake  
33  
34 to <2g (<90 mmol of sodium) per day, undertaking exercise that is compatible with  
35  
36 cardiovascular health and tolerance for at least 30 minutes 5 times per week and limiting  
37  
38 intake of alcohol as options for BP control.<sup>9</sup>  
39  
40  
41  
42  
43

44  
45 Blood pressure exhibits a high level of short term (24-hour ambulatory recordings)  
46  
47 and long-term (office visit-to-visit) variability and both are associated with adverse outcomes  
48  
49 independent of mean 24-hour or office-to-office BP values.<sup>11,12</sup> A number of studies have  
50  
51 reported on the association between BP variability and risk CV events, progression of kidney  
52  
53 failure or death in patients with CKD.<sup>13-15</sup> Although they mainly report no usefulness of  
54  
55 short-term variability in predicting adverse events in CKD patients, they show an association  
56  
57 with CV events and death using long-term BP variability. In one Italian study of 402 CKD  
58  
59  
60

1  
2  
3 patients with median follow-up of 4.8 years, although long-term BP variability was  
4  
5 associated with composite end-point of CV event or death (HR: 1.24; 95% confidence  
6  
7 interval (CI): 1.01 – 1.51 per 5-mmHg higher systolic difference of office systolic BP), short-  
8  
9 term systolic BP variability was not (HR: 0.92; 95%CI; 0.68 – 1.25 per 5-mm Hg higher SD  
10  
11 of 24-hour ambulatory systolic BP).<sup>13</sup> In another large population-based cohort that included  
12  
13 225,759 Chinese hypertensive adults with median follow-up of 70.5 months, there were  
14  
15 25,714 CV events, 27,603 incident CKD and 16,778 deaths reported. Systolic BP variability  
16  
17 was continuously and positively associated with increased CV events (hazard ratio 1.35, 95%  
18  
19 CI 1.30-1.39]), incident CKD (HR 1.39, 95% CI 1.35-1.43) and mortality risk (HR 1.40, 95%  
20  
21 CI 1.34-1.45).<sup>16</sup>

### 22 23 24 25 26 **Home blood pressure telemonitoring (HBPT)**

27  
28 Blood pressures recorded out-of-office (either home BP monitoring [HBPM] or  
29  
30 ambulatory BP monitoring [ABPM]) provide readings taken in conditions that are more  
31  
32 representative of daily life than conventional office readings. Given that the goal of  
33  
34 hypertension detection and treatment is to reduce mortality, and adverse CV and kidney  
35  
36 outcomes, use of HBPM is encouraged as it is more accurate and superior to office BP  
37  
38 monitoring (OBPM) in predicting CV events and all-cause mortality.<sup>17,18</sup> Also, OBPM does  
39  
40 not always correctly identify patients with hypertension due to “white-coat” or “masking”  
41  
42 effects, however, HBPM improves BP monitoring and provides more representative BP data  
43  
44 and better prediction of outcomes.<sup>19</sup> The ability to transmit, in real-time, data from HBPM  
45  
46 device to a caregiver improves the chance of better BP control when combined to decision-  
47  
48 making strategies can reduce adverse outcomes associated with hypertension.<sup>20</sup>

49  
50  
51  
52  
53  
54 Home BP telemonitoring (HBPT) is based on the use of clinically validated electronic  
55  
56 automated BP monitors storing BP values obtained at patient’s home and promotes a more  
57  
58 effective link between patients and their caregivers.<sup>20,21</sup> Increasingly, researchers have  
59  
60

1  
2  
3 leveraged on telemonitoring technology for the monitoring and treatment of patients with  
4 various chronic conditions such as heart diseases,<sup>22</sup> respiratory diseases,<sup>23</sup> diabetes<sup>24</sup> and  
5 hypertension.<sup>25,26</sup>  
6  
7  
8  
9

10 The Telemonitoring and Self-Management in Hypertensions (TASMINH2) study has  
11 shown that self-management of hypertension is possible as most participants made at least  
12 one medication change, were confident about self-monitoring and many felt their multiple  
13 home readings were more valid than single office readings taken by their doctor.<sup>27,28</sup> In a  
14 subsequent study (TASMINH4), when compared to usual care, the adjusted mean SBP  
15 differences with self-monitoring was  $-3.5$  mm Hg [95% CI  $-5.8$  to  $-1.2$ ;  $P=0.0029$ ] and  
16  $-4.7$  mm Hg [ $-7.0$  to  $-2.4$ ;  $P<0.0001$ ] for telemonitoring.<sup>29</sup> HBPT has also been shown to  
17 be cost-effective<sup>30</sup> and more effective in achieving BP control than usual care (RR: 1.16; 95%  
18 CI: 1.08–1.25;  $P<0.001$ ).<sup>31</sup> However, when HBPT was combined with additional care (e.g.  
19 counselling, education, behavioral management, etc) and compared with HBPT alone, there  
20 were increased mean changes in SBP and DBP, suggesting that HBPT can be more  
21 efficacious when proactive additional support is provided.<sup>31</sup>  
22  
23  
24  
25  
26  
27  
28  
29  
30  
31  
32  
33  
34  
35  
36  
37

38 Other outcomes (e.g. quality of life and cost) have also been evaluated. For example, in  
39 patients with kidney disease, telemonitoring has also been shown as a useful tool for  
40 improving quality of life (QoL)<sup>32</sup> and associated with reduced healthcare resource utilization  
41 and costs in patients receiving automated peritoneal dialysis.<sup>33</sup> A recent systematic review  
42 and meta-analysis was conducted to evaluate the effects of telehealth on BP management in  
43 non-dialysis CKD patients.<sup>34</sup> From the 2 studies they included for meta-analysis, pooled  
44 estimates showed decreased SBP (mean difference (MD),  $-5.10$ ; 95% CI:  $-11.34$ ,  $1.14$ ;  
45  $p=0.11$ ), increased DBP (MD,  $0.45$ ; 95% CI,  $-4.24$ ,  $5.13$ ;  $p=0.85$ ), decreased serum creatinine  
46 (pooled MD,  $-0.38$ ; 95% CI,  $-0.83$ ,  $0.07$ ;  $p=0.10$ ) and maintained eGFR (pooled MD,  $4.72$ ;  
47 95% CI,  $-1.85$ ,  $11.29$ ;  $p=0.16$ ) in the telehealth group.<sup>34</sup> However, Luo et al used studies with  
48  
49  
50  
51  
52  
53  
54  
55  
56  
57  
58  
59  
60

1  
2  
3 telehealth interventions for BP control in only stage 3 – 5 CKD patients. Table 2 is a  
4  
5 summary of the characteristics of their study design and the planned characteristics of our  
6  
7 study.  
8  
9

### 10 **Objective:**

11  
12 Given that an increasing number of studies<sup>25-29</sup> have shown the efficacy of HBPT on  
13  
14 hypertension control and outcomes with dearth of data for CKD, the aim of the current  
15  
16 review is to specifically determine the impact of HBPT and management support on BP  
17  
18 control and other pre-specified CV and kidney-related outcomes in patients with non-dialysis  
19  
20 CKD.  
21  
22

### 23 **Methods and Analysis**

24  
25 We used the Preferred Reporting Items for Systematic reviews and Meta-Analyses for  
26  
27 Protocols 2015 (PRISMA-P 2015) to develop this protocol.<sup>35</sup> PROSPERO registration  
28  
29 number: (CRD42020190705).  
30  
31  
32

### 33 **Criteria for considering studies for the review**

#### 34 *Types of studies*

35  
36 We plan to include all study designs including time series studies, before/after studies,  
37  
38 observational studies, randomized controlled trials (RCTs) as well previously published  
39  
40 reviews that evaluated telemonitoring for BP control or reports an outcome.  
41  
42  
43

#### 44 *Types of participants*

45  
46 We will include studies that have participants over 18 years of age, regardless of sex  
47  
48 and ethnicity with a diagnosis of CKD (stage 1 to 5, but not on dialysis and not transplanted).  
49  
50

#### 51 *Types of interventions*

52  
53 The intervention of interest will be use of HBPT (with or without management  
54  
55 support - nurses, pharmacist, physician, informed self-management of medications, health  
56  
57 aids, exercise programs, nutritional programs, etc) for BP assessment and monitoring. A  
58  
59  
60

1  
2  
3 telemonitoring intervention will be defined as any process or program that involves  
4 transmission of BP records via information and communication technologies (ICT) using  
5 conduits leveraging a telephone or internet line (phones, computers, tablets, etc). To be  
6 eligible, included studies will have reported on at least one outcome of interest. Comparators  
7 will include usual care and other interventions such as other BP device, education,  
8 counselling and behavioral management used to control BP. Studies that include only patients  
9 with CKD and no comparators will also be included if they meet other inclusion criteria.

### 19 *Types of outcome assessments*

21 The primary outcome will be any changes in mean SBP, mean DBP and/or mean  
22 arterial pressure (MAP) as well as proportion of controlled BP defined by each randomized  
23 trial's investigators. Secondary outcomes will include progression of CKD (eGFR,  
24 proteinuria criteria), hospitalizations, incident fatal and non-fatal CV events, all-cause  
25 mortality, cost effectiveness, patient-reported outcome measures and patient-reported  
26 experience measures.

### 35 **Search methods for identification of studies**

#### 37 *Electronic searches*

40 We will electronically search the following databases: MEDLINE, Embase, Cochrane  
41 Library, CINAHL, ISI Web of Science and PsycINFO. We will search for studies of  
42 interventions published from inception to 2020 with no language restriction and designed to  
43 compare the impact of telemonitoring of BP with management support (nurses, pharmacist,  
44 physician, health aids, etc) compared to usual care in improving BP control and other  
45 outcomes in non-dialysis CKD patients. The search strategy will be developed after  
46 discussion among reviewers using guidance from the Cochrane handbook.<sup>36</sup> Using controlled  
47 vocabulary, we will adapt the MEDLINE search strategy for other databases. The search  
48 strategy for MEDLINE is shown in Table 3.

### ***Other sources***

We will search the bibliographies of all relevant and selected publications for further studies and will also search grey literature using recommended resources in consultation with our medical Librarian. Thus, we will search ProQuest Dissertations & Theses Global, and Conference Proceedings Citation Index (Clarivate Analytics).

### **Data collection and analysis**

#### ***Study selection***

We will use a 2-stage collaborative review process for screening and selection of studies to be included. In the first stage, 2 reviewers (SM and MT) will independently assess the titles/abstracts of retrieved studies to be selected for full text screening if conducted in a non-dialysis CKD population (stage 1 – 5). In the second stage, full texts, having met the above criteria will be obtained for further screening and will be included if HBPT (with or without management support - nurses, pharmacist, physician, health aids, etc) is used as the intervention and the study reports one of the stated outcomes of interest. A third reviewer (IGO) will evaluate any discrepancies, if necessary, and will advise in case of disagreement. We will record all reasons for exclusion and exclude studies not using HBPT as the intervention to improve BP control. Figure 1 is a summary of the process that will be used for study selection. Thus, the inclusion and exclusion criteria for the study will be:

#### ***Inclusion criteria:***

- Studies conducted in a non-dialysis CKD population.
- Studies using HBPT (with or without management support i.e. nurses, pharmacist, physician, health aids, etc) as the intervention.
- Studies reporting on at least one outcome measure (BP change / control, CV outcomes or CKD outcomes, patient-reported outcome measures and patient-reported experience measures)



- Studies that include only patients with CKD and no comparators will be included if they meet other inclusion criteria.
- Publication date (no restriction)
- Language restriction (none)

***Exclusion criteria:***

- Studies reporting other forms of ehealth for hypertension control but not involving BP telemonitoring.
- Review articles, editorials, letters to the editor, commentaries, case studies, case reports, images and studies in which we are unable to get relevant data even after attempts to get these from the authors.
- Studies in which the specific outcomes of interest cannot be clearly identified or extrapolated (e.g. studies reporting differences between groups but not providing information on the entire group)

***Data extraction and management***

Two reviewers (SM and MT) will independently extract data and summarize the details of selected studies using a standard data extraction sheet. All extracted data will be reviewed for accuracy and completeness. The data items we will collect will include general study characteristics (e.g. study type, publication year country, etc), study design (RCT, observational, case-control study, cohort, etc), type of intervention utilized (HBPT alone or with management support), duration of intervention, outcomes and conclusions. If more than one outcome time (e.g. 12 and 24 months) is reported, the data on the longest follow-up will be extracted.

***Assessment of risk of bias in included studies***

Methodological quality will be evaluated using the checklist developed by Hoy et al<sup>37</sup> to assess the risk of bias in primary studies. This quality assessment tool incorporates

1  
2  
3 assessments of risk of bias across core domains including sampling, the sampling technique  
4 and size, outcome measurement, response rate, and statistical reporting. We will also present  
5 the overall risk of bias per study in a risk of bias summary table and we will examine for  
6 publication bias using a funnel plot. If the funnel plot is asymmetrical, we will explore  
7 possible causes including publication bias, poor methodological quality and true  
8 heterogeneity.  
9

### 16 ***Measures of treatment effect***

17  
18 We will present the effects on BP between interventions at follow-up (SBP and DBP)  
19 according to the HBPT interventions proposed in each study. Dichotomous outcomes will be  
20 presented as risk ratios while continuous outcomes will be presented as mean differences  
21 (MD) between the change in the intervention and control groups if the outcomes have been  
22 measured and reported in the same way across all studies. If the continuous outcomes have  
23 been measured in different ways across studies, then we will use the standardized MD  
24 between the intervention and control groups. We will present time-to-event outcomes as HR.  
25 We will report 95% CIs for all outcomes.  
26  
27  
28  
29  
30  
31  
32  
33  
34  
35  
36

### 37 ***Dealing with missing data***

38  
39 In the case of missing or unclear data, we will contact the authors to request such  
40 information related to study methods, attrition rates and outcomes. Where possible, we will  
41 calculate missing data using available relevant information including imputing data, where  
42 appropriate. All missing outcome data will also be reported in the data extraction form and  
43 risk of bias table.  
44  
45  
46  
47  
48  
49  
50

### 51 ***Assessment of heterogeneity***

52  
53 We will assess heterogeneity among studies in relation to participant characteristics  
54 (diabetic CKD and others), intervention type (HBPT alone or HBPT plus management),  
55 duration and outcome (BP control, CKD progression, death or QoL). We will test statistical  
56  
57  
58  
59  
60

1  
2  
3 heterogeneity using the  $\chi^2$  test (considering a value of  $p < 0.1$  to indicate heterogeneity) and  
4  
5 estimate the amount of heterogeneity using the  $I^2$  statistic ( $I^2$  values of  $< 25\%$ ,  $25\%$ –  
6  
7  $50\%$  and  $> 50\%$  represent low, medium and high heterogeneity, respectively).<sup>36</sup> We will  
8  
9 assess reasons for heterogeneity through subgroup analysis.  
10  
11

### 12 ***Data synthesis***

14 We will summarize the characteristics of included studies in a table and we will assess  
15  
16 if there is possibility to conduct a meta-analysis. If the characteristics of included studies are  
17  
18 excessively heterogeneous, we will not pool results, but we will only present a narrative  
19  
20 synthesis of the results of group findings by context measures. If a meta-analysis is  
21  
22 conducted, intervention effects will be calculated as relative risks (RR) with 95% CIs for  
23  
24 dichotomous data and we will calculate mean differences (MD) with 95% CIs for continuous  
25  
26 variables. Whether a fixed effects model or a random effects model will be used depends on  
27  
28 the results of the  $\chi^2$  test and  $I^2$  test for heterogeneity. If there is substantial statistical  
29  
30 heterogeneity, we will adopt a random effects model whereas a fixed effects model will be  
31  
32 used if there is no substantial statistical heterogeneity ( $I^2 < 50\%$ ).  
33  
34  
35  
36

### 37 ***Subgroup analysis***

39 Subgroup analysis will be considered according to the following variables: age,  
40  
41 gender, CKD stage, study setting (rural vs urban or low-income and middle-income vs high-  
42  
43 income using the World Bank country classifications by income level)<sup>38</sup> study duration ( $< 6$   
44  
45 months vs  $> 6$  months) and hypertension status (controlled versus uncontrolled).  
46  
47  
48

### 49 ***Patient and public involvement***

51 Patients and the public will not be involved in this study.  
52  
53

### 54 ***Ethics and dissemination***

1  
2  
3 Ethical approval will not be needed for this study as data used will be extracted from  
4 already published studies. Our dissemination strategy will use traditional approaches,  
5 including open-access peer-reviewed publication(s), scientific presentations and a report.  
6  
7  
8  
9

## 10 **Discussion**

11  
12 Hypertension is the leading prognostic marker for risk of adverse health outcomes in  
13 patients with CKD, and effective BP control to mitigate this risk remains a challenge. There  
14 is limited data on the use of HBPT for assessing and monitoring BP control in patients with  
15 CKD. This work will therefore provide new information on the potential role of HBPT in the  
16 management of hypertension and reducing adverse health outcomes in comparison with usual  
17 care. As telehealth practices and telemonitoring technologies continue to evolve worldwide,  
18 this study will demonstrate the impact of HBPT for hypertension monitoring and control as  
19 well as its impact on fatal and non-fatal CV events, progression of kidney function, QoL and  
20 death in non-dialysis CKD patients. Strengths and limitations of this study will be highlighted  
21 in the process of identified evidence.  
22  
23  
24  
25  
26  
27  
28  
29  
30  
31  
32  
33  
34  
35  
36  
37  
38  
39  
40  
41  
42  
43  
44  
45  
46  
47  
48  
49  
50  
51  
52  
53  
54  
55  
56  
57  
58  
59  
60

**Author contributions:**

IGO and AKB conceived the study design. The first version of the protocol was drafted by IGO and AKB and was revised by SM, MMT, DZ, LNH, BB, KJ, SK, RP, SS and ST. The search strategy was developed and performed by LNH. SM, MMT and DZ will perform the screening, study selection and collect data from all included studies. All authors drafted and critically reviewed this manuscript and approved the final version.

**Funding:**

Funding for this study was provided through the Alberta Kidney Care- North (formerly, Northern Alberta Renal Program)/AMGEN incorporated Grant: Improving access to care for rural northern CKD patients through eHealth technologies.

'Award/Grant number is not applicable'

**Competing interests:**

RP is CEO of mmHg Inc., a digital health company creating guideline-concordant innovations to improve the efficiency of remote patient monitoring. All other authors declare no conflict of interest.

**Patient consent:**

Not required.

**Data sharing statement:**

We will make data available on request

1  
2  
3 **Figure legends:**  
4

5  
6 **Figure 1:** PRISMA flow chart for process of study selection  
7  
8  
9  
10  
11  
12  
13  
14  
15  
16  
17  
18  
19  
20  
21  
22  
23  
24  
25  
26  
27  
28  
29  
30  
31  
32  
33  
34  
35  
36  
37  
38  
39  
40  
41  
42  
43  
44  
45  
46  
47  
48  
49  
50  
51  
52  
53  
54  
55  
56  
57  
58  
59  
60

For peer review only

**REFERENCES**

1. Williams B, Mancia G, Spiering W, et al. 2018 Practice Guidelines for the management of arterial hypertension of the European Society of Hypertension and the European Society of Cardiology: ESH/ESC Task Force for the Management of Arterial Hypertension. *J Hypertens*. 2018;36(12):2284-2309.
2. Mills KT, Bundy JD, Kelly TN, et al. Global Disparities of Hypertension Prevalence and Control: A Systematic Analysis of Population-Based Studies From 90 Countries. *Circulation*. 2016;134(6):441-450.
3. Glynn LG, Murphy AW, Smith SM, Schroeder K, Fahey T. Interventions used to improve control of blood pressure in patients with hypertension. *The Cochrane database of systematic reviews*. 2010(3):Cd005182.
4. Beaney T, Schutte AE, Stergiou GS, et al. May Measurement Month 2019: The Global Blood Pressure Screening Campaign of the International Society of Hypertension. *Hypertension*. 2020.
5. Molinero A, Ruilope LM, Tous S, et al. May Measurement Month 2017: an analysis of blood pressure screening in Spain-Europe. *Eur Heart J Suppl*. 2019;21(Suppl D):D107-d110.
6. Woodiwiss AJ, Kruger R, Norton GR, et al. May Measurement Month 2017: an analysis of blood pressure screening results in South Africa-Sub-Saharan Africa. *Eur Heart J Suppl*. 2019;21(Suppl D):D104-d106.
7. Muntner P, Anderson A, Charleston J, et al. Hypertension awareness, treatment, and control in adults with CKD: results from the Chronic Renal Insufficiency Cohort (CRIC) Study. *American journal of kidney diseases : the official journal of the National Kidney Foundation*. 2010;55(3):441-451.
8. USRDS. *USRDS 2010 Annual Data Report: Atlas of Chronic Kidney Disease and End-Stage Renal Disease in the United States*, National Institutes of Health, National Institute of Diabetes and Digestive and Kidney Diseases, Bethesda, MD. 2010.
9. KDIGO. Chapter 2: Lifestyle and pharmacological treatments for lowering blood pressure in CKD ND patients. *Kidney International Supplements*. 2012;2(5):347-356.
10. Whelton PK, Carey RM, Aronow WS, et al. 2017 ACC/AHA/AAPA/ABC/ACPM/AGS/APhA/ASH/ASPC/NMA/PCNA Guideline for the Prevention, Detection, Evaluation, and Management of High Blood Pressure in Adults: Executive Summary: A Report of the American College of Cardiology/American Heart Association Task Force on Clinical Practice Guidelines. *Hypertension*. 2018;71(6):1269-1324.
11. Muntner P, Shimbo D, Tonelli M, Reynolds K, Arnett DK, Oparil S. The relationship between visit-to-visit variability in systolic blood pressure and all-cause mortality in the general population: findings from NHANES III, 1988 to 1994. *Hypertension*. 2011;57(2):160-166.
12. Parati G, Ochoa JE, Lombardi C, Bilo G. Blood pressure variability: assessment, predictive value, and potential as a therapeutic target. *Curr Hypertens Rep*. 2015;17(4):537.

13. Mallamaci F, Tripepi G, D'Arrigo G, et al. Blood Pressure Variability, Mortality, and Cardiovascular Outcomes in CKD Patients. *Clinical journal of the American Society of Nephrology : CJASN*. 2019;14(2):233-240.
14. Whittle J, Lynch AI, Tanner RM, et al. Visit-to-Visit Variability of BP and CKD Outcomes: Results from the ALLHAT. *Clinical journal of the American Society of Nephrology : CJASN*. 2016;11(3):471-480.
15. Borrelli S, Garofalo C, Mallamaci F, et al. Short-term blood pressure variability in nondialysis chronic kidney disease patients: correlates and prognostic role on the progression of renal disease. *J Hypertens*. 2018;36(12):2398-2405.
16. Wan EYF, Yu EYT, Chin WY, Fong DYT, Choi EPH, Lam CLK. Association of visit-to-visit variability of systolic blood pressure with cardiovascular disease, chronic kidney disease and mortality in patients with hypertension. *J Hypertens*. 2020;38(5):943-953.
17. Sega R, Facchetti R, Bombelli M, et al. Prognostic value of ambulatory and home blood pressures compared with office blood pressure in the general population: follow-up results from the Pressioni Arteriose Monitorate e Loro Associazioni (PAMELA) study. *Circulation*. 2005;111(14):1777-1783.
18. Ohkubo T, Imai Y, Tsuji I, et al. Home blood pressure measurement has a stronger predictive power for mortality than does screening blood pressure measurement: a population-based observation in Ohasama, Japan. *J Hypertens*. 1998;16(7):971-975.
19. Ward AM, Takahashi O, Stevens R, Heneghan C. Home measurement of blood pressure and cardiovascular disease: systematic review and meta-analysis of prospective studies. *J Hypertens*. 2012;30(3):449-456.
20. Omboni S, Ferrari R. The role of telemedicine in hypertension management: focus on blood pressure telemonitoring. *Curr Hypertens Rep*. 2015;17(4):535.
21. Parati G, Pellegrini D, Torlasco C. How Digital Health Can Be Applied for Preventing and Managing Hypertension. *Curr Hypertens Rep*. 2019;21(5):40.
22. Iellamo F, Sposato B, Volterrani M. Telemonitoring for the Management of Patients with Heart Failure. *Card Fail Rev*. 2020;6:e07.
23. Chen C, Wang J, Pang L, Wang Y, Ma G, Liao W. Telemonitor care helps CPAP compliance in patients with obstructive sleep apnea: a systemic review and meta-analysis of randomized controlled trials. *Ther Adv Chronic Dis*. 2020;11:2040622320901625.
24. Franc S, Hanaire H, Benhamou PY, et al. DIABEO System Combining a Mobile App Software with and without Telemonitoring versus Standard Care: A Randomized Controlled Trial in Diabetic Patients Poorly Controlled with a Basal-Bolus Insulin Regimen. *Diabetes Technol Ther*. 2020.
25. Margolis KL, Asche SE, Dehmer SP, et al. Long-term Outcomes of the Effects of Home Blood Pressure Telemonitoring and Pharmacist Management on Blood Pressure Among Adults With Uncontrolled Hypertension: Follow-up of a Cluster Randomized Clinical Trial. *JAMA network open*. 2018;1(5):e181617.
26. Omboni S, Gazzola T, Carabelli G, Parati G. Clinical usefulness and cost effectiveness of home blood pressure telemonitoring: meta-analysis of randomized controlled studies. *J Hypertens*. 2013;31(3):455-467; discussion 467-458.



- 1
  - 2
  - 3
  - 4
  - 5
  - 6
  - 7
  - 8
  - 9
  - 10
  - 11
  - 12
  - 13
  - 14
  - 15
  - 16
  - 17
  - 18
  - 19
  - 20
  - 21
  - 22
  - 23
  - 24
  - 25
  - 26
  - 27
  - 28
  - 29
  - 30
  - 31
  - 32
  - 33
  - 34
  - 35
  - 36
  - 37
  - 38
  - 39
  - 40
  - 41
  - 42
  - 43
  - 44
  - 45
  - 46
  - 47
  - 48
  - 49
  - 50
  - 51
  - 52
  - 53
  - 54
  - 55
  - 56
  - 57
  - 58
  - 59
  - 60
27. Bray EP, Jones MI, Banting M, et al. Performance and persistence of a blood pressure self-management intervention: telemonitoring and self-management in hypertension (TASMINH2) trial. *J Hum Hypertens*. 2015;29(7):436-441.
28. Jones MI, Greenfield SM, Bray EP, et al. Patients' experiences of self-monitoring blood pressure and self-titration of medication: the TASMINH2 trial qualitative study. *Br J Gen Pract*. 2012;62(595):e135-142.
29. McManus RJ, Mant J, Franssen M, et al. Efficacy of self-monitored blood pressure, with or without telemonitoring, for titration of antihypertensive medication (TASMINH4): an unmasked randomised controlled trial. *Lancet (London, England)*. 2018;391(10124):949-959.
30. Monahan M, Jowett S, Nickless A, et al. Cost-Effectiveness of Telemonitoring and Self-Monitoring of Blood Pressure for Antihypertensive Titration in Primary Care (TASMINH4). *Hypertension*. 2019;73(6):1231-1239.
31. Duan Y, Xie Z, Dong F, et al. Effectiveness of home blood pressure telemonitoring: a systematic review and meta-analysis of randomised controlled studies. *J Hum Hypertens*. 2017;31(7):427-437.
32. He T, Liu X, Li Y, Wu Q, Liu M, Yuan H. Remote home management for chronic kidney disease: A systematic review. *J Telemed Telecare*. 2017;23(1):3-13.
33. Makhija D, Alscher MD, Becker S, et al. Remote Monitoring of Automated Peritoneal Dialysis Patients: Assessing Clinical and Economic Value. *Telemedicine journal and e-health : the official journal of the American Telemedicine Association*. 2018;24(4):315-323.
34. Luo L, Ye M, Tan J, et al. Telehealth for the management of blood pressure in patients with chronic kidney disease: A systematic review. *J Telemed Telecare*. 2019;25(2):80-92.
35. Moher D, Shamseer L, Clarke M, et al. Preferred reporting items for systematic review and meta-analysis protocols (PRISMA-P) 2015 statement. *Systematic Reviews*. 2015;4(1):1.
36. Higgins JPT TJ, Chandler J, Cumpston M, Li T, Page MJ, Welch VA. *Cochrane Handbook for Systematic Reviews of Interventions version 6.0 (updated July 2019)*. . Cochrane, 2019. ; 2019.
37. Hoy D, Brooks P, Woolf A, et al. Assessing risk of bias in prevalence studies: modification of an existing tool and evidence of interrater agreement. *Journal of clinical epidemiology*. 2012;65(9):934-939.
38. WorldBank. World Bank Open Data. <http://data.worldbank.org/indicator>. Published 2020. Accessed.

Table 1: Definition and classification of hypertension (ESH) <sup>1</sup>

| Category                       | SBP (mmHg) |        | DBP (mmHg) |
|--------------------------------|------------|--------|------------|
| Optimal                        | < 120      | and    | < 80       |
| Normal                         | 120 – 129  | and/or | 80 – 84    |
| High normal                    | 130 – 139  | and/or | 85 – 89    |
| Grade 1 hypertension           | 140 – 159  | and/or | 90 – 99    |
| Grade 2 hypertension           | 160 – 179  | and/or | 100 – 109  |
| Grade 3 hypertension           | ≥ 180      | and/or | ≥ 110      |
| Isolated systolic hypertension | ≥ 140      | and    | < 90       |
| Office BP                      | ≥ 140      | and/or | ≥ 90       |
| Ambulatory BP                  |            |        |            |
| – Daytime (or awake) mean      | ≥ 135      | and/or | ≥ 85       |
| – Night-time (or asleep) mean  | ≥ 120      | and/or | ≥ 70       |
| – 24-hour mean                 | ≥ 130      | and/or | ≥ 80       |
| Home BP mean                   | ≥ 135      | and/or | ≥ 85       |

BP – Blood pressure, SBP – systolic blood pressure, DBP – diastolic blood pressure, ESH – European Society of Hypertension

Table 2: Comparison between a previous systematic review and this study

| Features            | Luo et al <sup>34</sup>                                                                                                                                                                                                                                                                                                                                                               | This study                                                                                                                                                                                                                                                                                                                                                                                                                                                                                                                                                                                                                                                                                      |
|---------------------|---------------------------------------------------------------------------------------------------------------------------------------------------------------------------------------------------------------------------------------------------------------------------------------------------------------------------------------------------------------------------------------|-------------------------------------------------------------------------------------------------------------------------------------------------------------------------------------------------------------------------------------------------------------------------------------------------------------------------------------------------------------------------------------------------------------------------------------------------------------------------------------------------------------------------------------------------------------------------------------------------------------------------------------------------------------------------------------------------|
| Study design        | Systematic review                                                                                                                                                                                                                                                                                                                                                                     | Systematic review (with possible meta-analysis if there is sufficient homogeneity of included studies to allow this)                                                                                                                                                                                                                                                                                                                                                                                                                                                                                                                                                                            |
| End of study search | 2017                                                                                                                                                                                                                                                                                                                                                                                  | 2020                                                                                                                                                                                                                                                                                                                                                                                                                                                                                                                                                                                                                                                                                            |
| Population          | CKD (stage 3 – 5)                                                                                                                                                                                                                                                                                                                                                                     | Non-dialysis CKD (stage 1 – 5)                                                                                                                                                                                                                                                                                                                                                                                                                                                                                                                                                                                                                                                                  |
| Inclusion criteria  | (1) CKD 3-5 patients over the age of 18;<br>(2) Administered telemedicine to intervention groups;<br>(3) Randomised controlled trials (RCTs) or quasi-randomised controlled trials (qRCTs);<br>(4) Reported at least one main outcome including SBP, diastolic blood pressure (DBP) or mean arterial pressure (MAP).                                                                  | CKD 1 – 5 patients over the age of 18<br>Will use home BP telemonitoring as intervention for BP control (including studies using additional non-telemonitoring management approaches e.g. nurses, pharmacists, counseling, education or behavioral methods)<br>All study designs will be eligible for inclusion including time series studies, before/after studies, non-traditional comparison studies, clinical trials as well previously published reviews<br>Reported at least one outcome including achievement of guideline-concordant targets on BP control, progression of CKD (eGFR, proteinuria criteria), hospitalizations, cost reduction, incident CVD, and quality of life (QoL). |
| Exclusion criteria  | (1) Studies including patients on renal replacement therapy;<br>(2) Studies using additional non-telemedicine approaches such as face-to-face education or nutritional guidance in the multifactorial intervention for the intervention group;<br>(3) Studies that were not reported in either English or Chinese;<br>(4) Studies with inaccessible or incomplete crucial information | CKD patient on KRT (dialysis or kidney transplantation)<br>No language restriction<br>Studies with inaccessible or incomplete information                                                                                                                                                                                                                                                                                                                                                                                                                                                                                                                                                       |
| Intervention        | Telehealth / telemedicine                                                                                                                                                                                                                                                                                                                                                             | Home BP telemonitoring with or without management support (nurses, pharmacist, physician, health aids, etc)                                                                                                                                                                                                                                                                                                                                                                                                                                                                                                                                                                                     |
| Comparator          | Usual / standard of care                                                                                                                                                                                                                                                                                                                                                              | Usual / standard of care or other modes of eHealth used for comparison with HBPT                                                                                                                                                                                                                                                                                                                                                                                                                                                                                                                                                                                                                |
| Outcome(s)          | SBP, DBP, MAP, estimated glomerular filtration rate (eGFR), creatinine, blood pressure control rate,                                                                                                                                                                                                                                                                                  | BP control (SBP, DBP, MAP), progression of CKD (eGFR, serum creatinine, proteinuria criteria), hospitalizations, incident CVD and QoL                                                                                                                                                                                                                                                                                                                                                                                                                                                                                                                                                           |

CKD – chronic kidney disease, CVD – cardiovascular disease, HBPT – Home blood pressure telemonitoring, SBP – systolic blood pressure, DBP – diastolic blood pressure, KRT – Kidney replacement therapy, eGFR – estimated glomerular filtration rate

**Table 3: MEDLINE search terms and strategy**

| #  | Search term                                  | #  | Search term                                                                  |
|----|----------------------------------------------|----|------------------------------------------------------------------------------|
| 1  | exp Hypertension/                            | 34 | (consult* and (skype or facetime or internet)).mp.                           |
| 2  | hypertens*.mp.                               | 35 | ((distan* or remote* or video*) adj2 (consult* or deliver* or diagnos*)).mp. |
| 3  | exp Blood Pressure/                          | 36 | ehealth*.mp.                                                                 |
| 4  | blood pressure*.mp                           | 37 | tele care.mp.                                                                |
| 5  | arter* pressure*.mp.                         | 38 | tele collaborat*.mp.                                                         |
| 6  | venous pressure*.mp.                         | 39 | tele consult*.mp.                                                            |
| 7  | vein pressure*.mp.                           | 40 | tele conference*.mp.                                                         |
| 8  | exp Blood Pressure Determination/            | 41 | tele health.mp.                                                              |
| 9  | 1 or 2 or 3 or 4 or 5 or 6 or 7 or 8         | 42 | tele guide*.mp.                                                              |
| 10 | exp Renal Insufficiency, Chronic/            | 43 | tele diagnos*.mp.                                                            |
| 11 | Chronic Kidney disease*.mp.                  | 44 | tele med*.mp.                                                                |
| 12 | chronic kidney insufficienc*.mp.             | 45 | tele monitor*.mp.                                                            |
| 13 | chronic renal disease*.mp.                   | 46 | tele presence*.mp.                                                           |
| 14 | chronic renal insufficienc*.mp.              | 47 | tele robotic*.mp.                                                            |
| 15 | CKD.mp.                                      | 48 | tele screen*.mp.                                                             |
| 16 | Renal fail*.mp.                              | 49 | tele transmi*.mp.                                                            |
| 17 | Kidney fail*.mp.                             | 50 | (teletherap* not (x-ray or radiat* or cobalt or gamma* or cesium)).mp.       |
| 18 | 10 or 11 or 12 or 13 or 14 or 15 or 16 or 17 | 51 | telemetry/                                                                   |
| 19 | exp Telemedicine/                            | 52 | telemetry.mp.                                                                |
| 20 | telecare.mp.                                 | 53 | Telemetries.mp.                                                              |
| 21 | telecollaborat*.mp.                          | 54 | telenurs*.mp.                                                                |
| 22 | teleconsult*.mp.                             | 55 | telephone/                                                                   |
| 23 | teleconference*.mp.                          | 56 | Telephon*.mp.                                                                |
| 24 | telehealth.mp.                               | 57 | smartphone/                                                                  |
| 25 | teleguide*.mp.                               | 58 | smartphone*.mp.                                                              |
| 26 | telediagnos*.mp.                             | 59 | Cell phone/                                                                  |
| 27 | telemed*.mp.                                 | 60 | cellphone*.mp                                                                |
| 28 | telemonitor*.mp                              | 61 | cell* phone*.mp                                                              |
| 29 | telepresence*.mp.                            | 62 | internet/                                                                    |
| 30 | telerehab*.mp.                               | 63 | internet*.mp.                                                                |
| 31 | telerobotic*.mp.                             | 64 | or/19-63                                                                     |
| 32 | telescreen*.mp.                              | 65 | 9 and 18 and 64                                                              |
| 33 | teletransmi*.mp.                             |    |                                                                              |

**Figure 1: PRISMA flow chart for process of study selection**

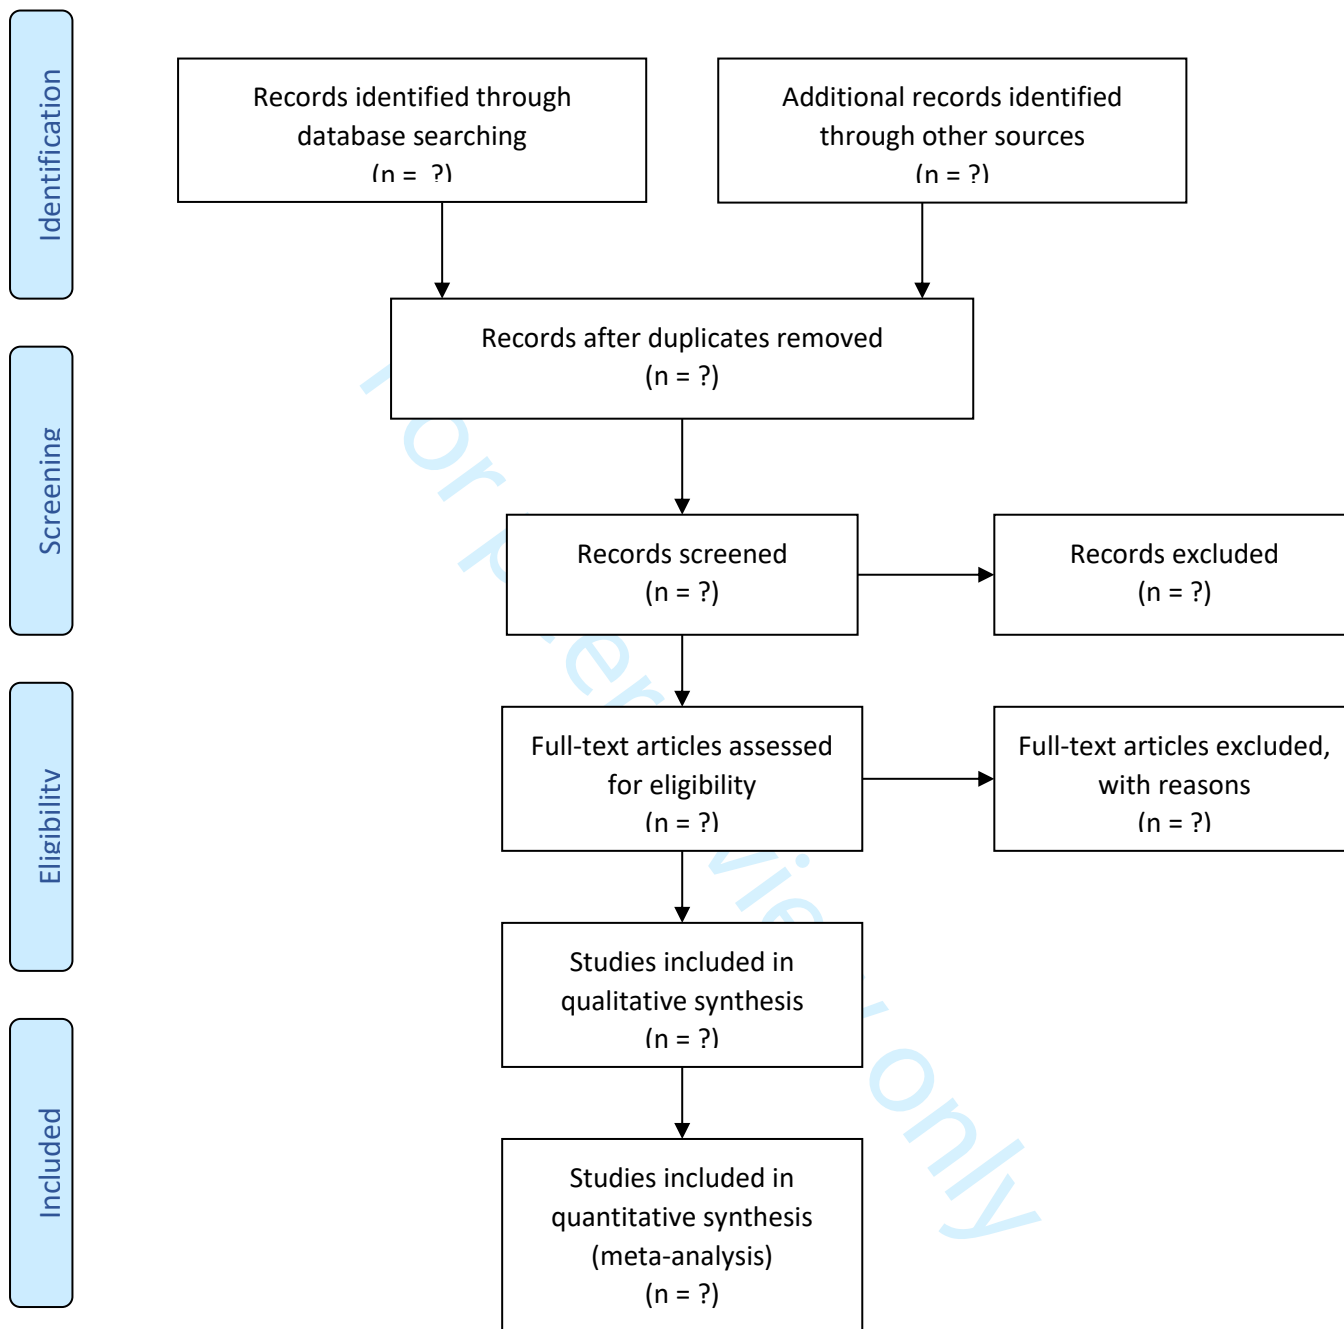

# Reporting checklist for protocol of a systematic review.

Based on the PRISMA-P guidelines.

## Instructions to authors

Complete this checklist by entering the page numbers from your manuscript where readers will find each of the items listed below.

Your article may not currently address all the items on the checklist. Please modify your text to include the missing information. If you are certain that an item does not apply, please write "n/a" and provide a short explanation.

Upload your completed checklist as an extra file when you submit to a journal.

In your methods section, say that you used the PRISMA-Preporting guidelines, and cite them as:

Moher D, Shamseer L, Clarke M, Ghersi D, Liberati A, Petticrew M, Shekelle P, Stewart LA. Preferred Reporting Items for Systematic Review and Meta-Analysis Protocols (PRISMA-P) 2015 statement. *Syst Rev.* 2015;4(1):1.

|                     | Reporting Item                                                                                                                                                                                                     | Page Number                  |
|---------------------|--------------------------------------------------------------------------------------------------------------------------------------------------------------------------------------------------------------------|------------------------------|
| <b>Title</b>        |                                                                                                                                                                                                                    | 1                            |
| Identification      | <a href="#">#1a</a> Identify the report as a protocol of a systematic review                                                                                                                                       | 1                            |
| Update              | <a href="#">#1b</a> If the protocol is for an update of a previous systematic review, identify as such                                                                                                             | N/A                          |
| <b>Registration</b> |                                                                                                                                                                                                                    |                              |
|                     | <a href="#">#2</a> If registered, provide the name of the registry (such as PROSPERO) and registration number                                                                                                      | (PROSPERO)<br>CRD42020190705 |
| <b>Authors</b>      |                                                                                                                                                                                                                    |                              |
| Contact             | <a href="#">#3a</a> Provide name, institutional affiliation, e-mail address of all protocol authors; provide physical mailing address of corresponding author                                                      | 1                            |
| Contribution        | <a href="#">#3b</a> Describe contributions of protocol authors and identify the guarantor of the review                                                                                                            | 15                           |
| <b>Amendments</b>   |                                                                                                                                                                                                                    |                              |
|                     | <a href="#">#4</a> If the protocol represents an amendment of a previously completed or published protocol, identify as such and list changes; otherwise, state plan for documenting important protocol amendments | N/A                          |
| <b>Support</b>      |                                                                                                                                                                                                                    |                              |
| Sources             | <a href="#">#5a</a> Indicate sources of financial or other support for the review                                                                                                                                  | 15                           |
| Sponsor             | <a href="#">#5b</a> Provide name for the review funder and / or sponsor                                                                                                                                            | 15                           |

|    |                      |                      |                                                                                               |        |
|----|----------------------|----------------------|-----------------------------------------------------------------------------------------------|--------|
| 1  | Role of sponsor or   | <a href="#">#5c</a>  | Describe roles of funder(s), sponsor(s), and / or institution(s), if any, in                  | 15     |
| 2  | funder               |                      | developing the protocol                                                                       |        |
| 3  | <b>Introduction</b>  |                      |                                                                                               |        |
| 4  | Rationale            | <a href="#">#6</a>   | Describe the rationale for the review in the context of what is already known                 | 6      |
| 5  | Objectives           | <a href="#">#7</a>   | Provide an explicit statement of the question(s) the review will address with                 | 7      |
| 6  |                      |                      | reference to participants, interventions, comparators, and outcomes (PICO)                    |        |
| 7  |                      |                      |                                                                                               |        |
| 8  | <b>Methods</b>       |                      |                                                                                               |        |
| 9  | Eligibility criteria | <a href="#">#8</a>   | Specify the study characteristics (such as PICO, study design, setting, time                  | 8 - 10 |
| 10 |                      |                      | frame) and report characteristics (such as years considered, language,                        |        |
| 11 |                      |                      | publication status) to be used as criteria for eligibility for the review                     |        |
| 12 |                      |                      |                                                                                               |        |
| 13 | Information sources  | <a href="#">#9</a>   | Describe all intended information sources (such as electronic databases,                      | 10     |
| 14 |                      |                      | contact with study authors, trial registers or other grey literature sources)                 |        |
| 15 |                      |                      | with planned dates of coverage                                                                |        |
| 16 |                      |                      |                                                                                               |        |
| 17 | Search strategy      | <a href="#">#10</a>  | Present draft of search strategy to be used for at least one electronic                       | 21     |
| 18 |                      |                      | database, including planned limits, such that it could be repeated                            |        |
| 19 |                      |                      |                                                                                               |        |
| 20 | Study records - data | <a href="#">#11a</a> | Describe the mechanism(s) that will be used to manage records and data                        | 12 -13 |
| 21 | management           |                      | throughout the review                                                                         |        |
| 22 |                      |                      |                                                                                               |        |
| 23 | Study records -      | <a href="#">#11b</a> | State the process that will be used for selecting studies (such as two                        | 10     |
| 24 | selection process    |                      | independent reviewers) through each phase of the review (that is, screening,                  |        |
| 25 |                      |                      | eligibility and inclusion in meta-analysis)                                                   |        |
| 26 |                      |                      |                                                                                               |        |
| 27 | Study records - data | <a href="#">#11c</a> | Describe planned method of extracting data from reports (such as piloting                     | 11     |
| 28 | collection process   |                      | forms, done independently, in duplicate), any processes for obtaining and                     |        |
| 29 |                      |                      | confirming data from investigators                                                            |        |
| 30 |                      |                      |                                                                                               |        |
| 31 | Data items           | <a href="#">#12</a>  | List and define all variables for which data will be sought (such as PICO items,              | 12     |
| 32 |                      |                      | funding sources), any pre-planned data assumptions and simplifications                        |        |
| 33 |                      |                      |                                                                                               |        |
| 34 | Outcomes and         | <a href="#">#13</a>  | List and define all outcomes for which data will be sought, including                         | 11, 20 |
| 35 | prioritization       |                      | prioritization of main and additional outcomes, with rationale                                |        |
| 36 |                      |                      |                                                                                               |        |
| 37 | Risk of bias in      | <a href="#">#14</a>  | Describe anticipated methods for assessing risk of bias of individual studies,                | 12     |
| 38 | individual studies   |                      | including whether this will be done at the outcome or study level, or both;                   |        |
| 39 |                      |                      | state how this information will be used in data synthesis                                     |        |
| 40 |                      |                      |                                                                                               |        |
| 41 | Data synthesis       | <a href="#">#15a</a> | Describe criteria under which study data will be quantitatively synthesised                   | 12     |
| 42 | Data synthesis       | <a href="#">#15b</a> | If data are appropriate for quantitative synthesis, describe planned summary                  | 13     |
| 43 |                      |                      | measures, methods of handling data and methods of combining data from                         |        |
| 44 |                      |                      | studies, including any planned exploration of consistency (such as I <sup>2</sup> , Kendall's |        |
| 45 |                      |                      | τ)                                                                                            |        |
| 46 |                      |                      |                                                                                               |        |
| 47 | Data synthesis       | <a href="#">#15c</a> | Describe any proposed additional analyses (such as sensitivity or subgroup                    | 13     |
| 48 |                      |                      | analyses, meta-regression)                                                                    |        |
| 49 |                      |                      |                                                                                               |        |
| 50 | Data synthesis       | <a href="#">#15d</a> | If quantitative synthesis is not appropriate, describe the type of summary                    | 13     |
| 51 |                      |                      | planned                                                                                       |        |
| 52 |                      |                      |                                                                                               |        |
| 53 | Meta-bias(es)        | <a href="#">#16</a>  | Specify any planned assessment of meta-bias(es) (such as publication bias                     | N/A    |
| 54 |                      |                      | across studies, selective reporting within studies)                                           |        |
| 55 | Confidence in        | <a href="#">#17</a>  | Describe how the strength of the body of evidence will be assessed (such as                   | 13     |
| 56 | cumulative evidence  |                      | GRADE)                                                                                        |        |
| 57 |                      |                      |                                                                                               |        |
| 58 |                      |                      |                                                                                               |        |
| 59 |                      |                      |                                                                                               |        |
| 60 |                      |                      |                                                                                               |        |

None The PRISMA-P checklist is distributed under the terms of the Creative Commons Attribution License CC-BY 4.0. This checklist can be completed online using <https://www.goodreports.org/>, a tool made by the [EQUATOR Network](#) in collaboration with [Penelope.ai](#)

1  
2  
3  
4  
5  
6  
7  
8  
9  
10  
11  
12  
13  
14  
15  
16  
17  
18  
19  
20  
21  
22  
23  
24  
25  
26  
27  
28  
29  
30  
31  
32  
33  
34  
35  
36  
37  
38  
39  
40  
41  
42  
43  
44  
45  
46  
47  
48  
49  
50  
51  
52  
53  
54  
55  
56  
57  
58  
59  
60

For peer review only
